## **Longitudinal analysis within one hospital in sub-Saharan Africa over 20 years reveals repeated replacements of dominant clones of *Klebsiella pneumoniae* and stresses the importance to include temporal patterns for vaccine design considerations**

\*Eva Heinz<sup>1,2</sup>, Oliver Pearse<sup>2,3</sup>, Allan Zuza<sup>3</sup>, Sithembile Bilima<sup>3</sup>, Chisomo Msefula<sup>4</sup>, Patrick Musicha<sup>2,3</sup>, Patriciah Siyabu<sup>5</sup>, Edith Tewesa<sup>5</sup>, Fabrice E Graf<sup>2</sup>, Rebecca Lester<sup>3,6</sup>, Samantha Lissauer<sup>3,7</sup>, Jennifer Cornick<sup>3,7</sup>, Joseph M Lewis<sup>2,3,7</sup>, Kondwani Kawaza<sup>3,4</sup>, Nicholas R Thomson<sup>8,9</sup>, \*Nicholas A Feasey<sup>2,3,10</sup>

1. Department of Vector Biology, Liverpool School of Tropical Medicine, Liverpool, UK
2. Department of Clinical Sciences, Liverpool School of Tropical Medicine, Liverpool, UK
3. Malawi Liverpool Wellcome Programme, Kamuzu University of Health Sciences, Blantyre, Malawi
4. Kamuzu University of Health Sciences, Blantyre, Malawi
5. Queen Elizabeth Central Hospital, Blantyre, Malawi
6. Division of Infection & Immunity, University College London, UK
7. Department of Clinical Infection, Microbiology and Immunology, University of Liverpool, Liverpool, UK
8. Parasites and Microbes Program, Wellcome Sanger Institute, Hinxton, UK
9. London School of Hygiene and Tropical Medicine, London, UK
10. School of Medicine, St Andrews University, UK

\*Contact: [eva.heinz@lstmed.ac.uk](mailto:eva.heinz@lstmed.ac.uk), [Nicholas.feasey@lstmed.ac.uk](mailto:Nicholas.feasey@lstmed.ac.uk)

**Keywords:** AMR, Malawi, genome surveillance, healthcare-associated, nosocomial infections, surface antigens, neonatal infection, sepsis, capsular polysaccharide, ESKAPE

1 **Abstract**

2 Infections caused by multidrug-resistant gram-negative bacteria present a severe threat to  
3 global public health. The WHO defines drug-resistant *Klebsiella pneumoniae* as a priority  
4 pathogen for which alternative treatments are needed given the limited treatment options and  
5 the rapid acquisition of novel resistance mechanisms by this species. Longitudinal  
6 descriptions of genomic epidemiology of *Klebsiella pneumoniae* can inform management  
7 strategies but data from sub-Saharan Africa are lacking.

8 We present a longitudinal analysis of all invasive *K. pneumoniae* isolates from a single  
9 hospital in Blantyre, Malawi, southern Africa, from 1998-2020, combining clinical data with  
10 genome sequence analysis of the isolates. We show that after a dramatic increase in the  
11 number of infections from 2016 *K. pneumoniae* becomes hyperendemic, driven by an increase  
12 in neonatal infections. Genomic data show repeated waves of clonal expansion of different,  
13 often ward-restricted, lineages, suggestive of hospital associated transmission. We describe  
14 temporal trends in resistance and surface antigens, of relevance for vaccine development.

15 Our data highlight a clear need for new interventions to prevent rather than treat *K.*  
16 *pneumoniae* infections in our setting. Whilst one option may be a vaccine, the majority of  
17 cases could be avoided by an increased focus on and investment in infection prevention and  
18 control measures, which would reduce all healthcare associated infections and not just one.

19  
20  
21  
22

## 23 Background

24 The burden of deaths in children under the age of five, including those due to neonatal sepsis,  
25 is especially high in low- and middle-income countries (LMICs)(1); and one of the main  
26 pathogens causing these is *Klebsiella pneumoniae* (*Kpn*)(2). Until the last decade, *Kpn* was  
27 typically readily treatable with beta-lactam antimicrobials, in particular third generation  
28 cephalosporins (3GC). The effectiveness of 3GC is lost when these bacteria acquire  
29 extended-spectrum beta-lactamase enzymes (ESBLs). For *Kpn* there has been a drastic  
30 increase in 3GC-resistance by acquisition of ESBL enzyme-encoding plasmids; the proportion  
31 of *Kpn* hospital isolates that are ESBL-producing increased from 12% to >90% in parts of sub-  
32 Saharan Africa (sSA) in the last decade(3). The main remaining treatment option are  
33 carbapenems; these however are uncommonly available in sSA, rendering *Kpn* effectively  
34 untreatable in large parts of Africa. This is particularly problematic for neonatal sepsis caused  
35 by *Kpn*, and there is increasing evidence from large studies such as BARNARDS(2) and  
36 CHAMPS(4) that the burden of disease caused by *Kpn* falls most heavily on this patient group.  
37 Treatment options for neonates are even more limited than for other age groups as therapy  
38 needs to be intravenous and some antimicrobial classes are contraindicated, however delay  
39 in establishing appropriate therapy is even more dangerous.

40  
41 The population structure of *Kpn*, similar to other opportunistic pathogens that thrive in the  
42 environment, is highly complex(5). Understanding long-term population trends of clinically  
43 relevant lineages at both a local and global scale, and which antimicrobial resistance plasmids  
44 and elements they encode, is potentially relevant to guiding treatment, infection prevention  
45 strategies and vaccine development. However, few longitudinal studies of *Kpn* population  
46 have been published so far, and the majority have come from collections established in high-  
47 income settings or South East Asia(6–10), whilst data from Africa and South America remain  
48 sparse. Low-income countries in sub-Saharan Africa are particularly underrepresented in  
49 'global' collections of pathogen genome data, despite often carrying the highest burden of  
50 disease(2).

51  
52 Whilst *Kpn* has a global distribution, there are clear geographical concentrations of dominant  
53 lineages and resistance genes, likely reflecting local antimicrobial pressure, patient  
54 populations, and a range of other determinants. Developing a more representative picture of  
55 the global epidemiology of *Kpn* is relevant to the development of vaccines targeting *Kpn*, to  
56 ensure that the lineages and associated LPS O-antigens and capsular polysaccharide  
57 antigens most prevalent in countries with the highest burden of disease are targeted. A better  
58 understanding of the genomic epidemiology of *Kpn* in low-income countries is also crucial to  
59 advocate for access to antimicrobials, in particular newer agents, which is often profoundly  
60 limited by cost, leaving isolates that can be readily treated in high- or middle-income countries  
61 *de facto* untreatable. Further, knowing at a facility level where problematic hotspots of  
62 transmission are within a hospital setting can help focus infection prevention and control (IPC)  
63 efforts.

64  
65 To address this urgent need for a better understanding of the *Kpn* population in sSA, we  
66 performed whole-genome sequencing on all bloodstream isolates phenotypically identified as  
67 *Kpn* from Queen Elizabeth Central Hospital (QECH) in Blantyre, Malawi, which has  
68 undertaken sentinel surveillance of bacteraemia and meningitis in partnership with the Malawi-  
69 Liverpool Wellcome Programme (MLW) since 1998(3). Our analyses include all isolates,  
70 irrespective of resistance profile or patient demographic, from 1996 to 2020, with no change

71 in sampling strategy from 2000 - 2020. We report the shifts in resistance profile and population  
72 structure over time and highlight the relevance to consider trends over time and not just total  
73 numbers for considerations of new drug regimens or vaccine target selection.

74

## 75 **Results**

### 76 **The QECH bloodstream isolate collection**

77 QECH is the main referral hospital for the southern region of Malawi and the main hospital for  
78 Blantyre, the second largest city of Malawi (population 800,024 at the 2018 census). It has  
79 approximately 1,000 beds and receives around 10,000 adult medical and 30,000 paediatric  
80 medical admissions per year. A quality assured diagnostic microbiology service was initially  
81 implemented in partnership with MLW at QECH in 1998. Laboratory blood culture was initially  
82 manual, and an automated system was implemented in 2000 (BacT/ALERT, Biomerieux). The  
83 diagnostic microbiology service expanded to culture cerebrospinal fluid (CSF) from 2002.  
84 During the study period, all adult and paediatric medical patients with suspected sepsis or  
85 meningitis were eligible for blood and/or CSF culture at the discretion of the admitting  
86 physician, and where possible before the administration of antimicrobials. Bacterial isolates  
87 were identified by standard techniques detailed in the methods.

88

89 At the start of the period, first-line treatment against bloodstream infections was crystal-  
90 penicillin and chloramphenicol although gentamicin was used in neonates instead of  
91 chloramphenicol. This began to change with the introduction of the 3<sup>rd</sup>-generation  
92 cephalosporin ceftriaxone from 2004, which was rapidly adopted as a first line agent by the  
93 Department of [adult] Medicine and more slowly by the Department of Paediatrics, which  
94 continues to use penicillin and gentamicin in the management of neonatal sepsis, as per WHO  
95 guidelines(11).

96

97 Members of the order Enterobacterales including *Kpn* were identified by API biochemical  
98 index (Biomerieux, France). *Klebsiella pneumoniae* is known to comprise a species complex  
99 including *Klebsiella pneumoniae subsp. pneumoniae* as well as several closely related  
100 species like *K. variicola* and *K. quasipneumoniae* and their respective subspecies(12). These  
101 can only be identified to species complex level via API, and we therefore refer to all members  
102 of the *K. pneumoniae* species complex as *Kpn* and specify when referring to specific  
103 (sub)species (Fig 1A).

104

### 105 **Dramatic increase in *Kpn* cases from 2016**

106 The crude frequency of *Kpn* cases was high at the start of the period with 121 cases in 1998,  
107 although this overlapped with a year of active surveillance of febrile adult patients(13) and we  
108 thus focused longitudinal analyses from 2000 onwards. The number of cases from 2000 -  
109 2015 was stable with a mean of 44 cases per year (Fig 1A). This increased to a mean of 187  
110 cases per year from 2016-2021 with a peak of 279 in 2019.

111

112 Neonatal infection with *Kpn* accounted for 39.3% of all *Kpn* infections, even though only 11.2%  
113 of all blood cultures were taken from this patient group. The overall rate of *Kpn* isolation was  
114 24.9 per 1000 blood cultures for neonates, 4.3 per 1000 blood cultures for other patients (rate  
115 ratio of neonates vs non-neonates 5.11 [95% CI 4.66 - 5.61]). The increase in *Kpn* cases post  
116 2016 was driven by an increase in neonatal infections (Fig S1A-1G); there were peaks in the  
117 *Kpn* blood culture isolation rate in neonates in 2008, 2014 and 2017 which suggest outbreaks  
118 or ongoing transmission on the neonatal unit (Fig 1B), and our genomic analyses further

119 support hospital transmission given the close genetic relationships of the respective isolates.  
120 Though the blood culture positivity rate was increased for most age groups in the period from  
121 2016-2021, for neonates this increase was particularly marked (33.5 per 1000 blood cultures  
122 in the period 2016-2021 compared to 15.4 per 1000 blood cultures in the period 1998-2015;  
123 Fig S1A-1D). As well as the peak in neonatal cases, there was also a much smaller peak in  
124 the adult age group, which shifted from the 30-35 year age group in the period from 1998-  
125 2015 to the 35-40 year age group in the period from 2016-2021 (Fig S1E-1H).

### 126 127 **Increase in *Kpn* numbers driven by temporally defined expansions of sequence types** 128 **(STs)**

129 We retrieved 1313 isolates not previously sequenced from the QECH *Kpn* collection, 1302 of  
130 which could be recovered for growth and yielded enough DNA for sequencing; and 1156 of  
131 these passed all quality control steps for further analysis (details see methods; Fig S2). In  
132 addition, we included 217 samples from previously published studies of this collection(14–16),  
133 resulting in 1373 sequenced genomes analysed in this study (Fig 1C).

134  
135 The majority (1274/1373, 92.8%) belong to *Klebsiella pneumoniae* subsp. *pneumoniae* with  
136 only very small proportions representing other (sub)species, including *K. quasipneumoniae*  
137 subsp. *quasipneumoniae* (10/1373, 0.7%), *K. quasipneumoniae* subsp. *simillipneumoniae*  
138 (46/1373, 3.4%) and *K. variicola* subsp. *variicola* (43/1373, 3.1%). Based on phenotypic  
139 microbiology data (Fig 1A and 1B) we observed a drastic increase in isolates from neonatal  
140 infection in 2016/2017 which is reflected in our sequenced collection.

141  
142 Assessing diversity of STs over time highlights that the increase in *Kpn* infections represents  
143 repeated increase and subsequent decrease in numbers of different multilocus sequence  
144 types (Fig 2A). Whilst the earlier years show a diverse composition of STs with small numbers  
145 of each ( $n < 15$  total), the increase in total *Kpn* numbers is mainly driven by one or two major  
146 STs, with these peaks spanning approximately 1.5 to 2 years each. We furthermore observe  
147 that after the increase of isolates of the major STs, each of them reverts to their original very  
148 low numbers (Fig 2A).

149  
150 A previous study(15) highlighted an outbreak of ST340 across the neonatal unit which is  
151 reflected here, where it comprises 31 out of 105 isolates in 2013 & 2014 (29.5%; Fig 2A). We  
152 then see an increase of the numbers of ST14 (19 / 44 in 2015; 43.2%) which is present at a  
153 lower proportion before and after this period; followed by an increase in ST25 (13 / 87 in 2016;  
154 14.9%) which again is present at lower proportions before and after. The year 2017 then saw  
155 a steep increase in *Kpn* infections overall; mainly driven by an expansion of ST39 which  
156 comprises more than half the samples at the time (100/188 in 2017; 53.2%). This clone  
157 however again retreats back to low numbers, with a few lineages dominating, in particular  
158 ST1552 (35 / 208 in 2018; 16.8%) and ST35 (40 / 208 in 2018; 19.2%). The year 2019 then  
159 sees another increase in ST14 (61 / 236 in 2019; 25.8%) as well as ST15 (30 / 236 in 2019;  
160 12.7%), which is a known high-risk clone predominantly found in South East Asian collections  
161 where it has been linked to an early spread of carbapenem resistances via *bla<sub>NDM</sub>*  
162 genes(17,18).

163  
164 **Isolation of *Kpn* from neonatal and paediatric wards account for observed changes,**  
165 **whilst adult infections remain stable over time**

166 The patterns over time differ significantly between wards (Fig 2B), suggesting the increase in  
167 *Kpn* infections could represent a pattern of repeated ward-specific outbreaks, rather than a  
168 generalised increase across all wards (Fig 2B). This pattern of ward-focused increases in  
169 isolate numbers was repeatedly observed on the Chatinkha neonatal unit and the surgical  
170 PICU/HDU, where most of the changes in numbers of isolates occur. An indication of local  
171 outbreaks is further supported by analysing the major STs, which increase at defined times in  
172 specific wards (Fig 2B and 2C; Fig S3). To investigate the impact of closely related isolates  
173 (<5 core SNP distance) that are likely within-hospital transmissions on the number of infections  
174 overall, we analysed a core genome tree for each of the three species and identified closest-  
175 neighbour SNP distances in a root-to-tip approach(19) (Fig 3). This highlighted that most  
176 highly clonal lineages (defined as <5 SNPs) are derived from *K. pneumoniae* subsp.  
177 *pneumoniae* (Fig 3A) representing 402 of 1165 isolates as a conservative estimate based on  
178 whole-species analyses, with 43% of the *K. quasipneumoniae* subsp. *similipneumoniae* (20  
179 of the 46 isolates in 6 lineages, Fig 3B) and 25% of the *K. variicola* isolates (10 of the 40  
180 isolates of this species, Fig 3C); and no <5 SNP related isolates of *K. quasipneumoniae* subsp.  
181 *quasipneumoniae*.

182  
183 Despite removing the single-isolate STs for this analysis, our dataset still contains a high  
184 number of *K. pneumoniae* subsp. *pneumoniae* STs, which results in a highly diverse dataset.  
185 As this diversity has potential to impact on tree resolution depending on reference used(20),  
186 we investigated three key STs in more detail. We focused on ST35, ST39, and the closely  
187 related ST14 and 15 together, whose pattern of accumulation in a ward and year strongly  
188 indicates multiple hospital-associated transmissions (Fig S3), in more detail by mapping  
189 against strain-specific reference genomes (Fig 3A). ST39 and ST35 are two key STs when  
190 considering the per-year breakdown of isolates per ward for the neonatal unit (Chatinka; Fig  
191 S3); whilst ST14 and ST15 were identified in high numbers in the PICU/HDU in the paediatric  
192 surgical ward (Fig S3). Here, we can observe that 77% of the isolates (51/55 ST35, 110/136  
193 ST39, 182/254 ST14-15) have their nearest neighbour within the threshold of 5 SNPs;  
194 representing 100% (17/17) of ST35 and 88.9% (80/90) of ST39 from Chatinka and 88%  
195 (57/65) ST14 and 15 from the PICU/HDU (Fig 3A). This high relatedness of isolates strongly  
196 supports within ward transmission and the argument that *Kpn* is a healthcare associated  
197 cause of neonatal sepsis. As patients are regularly transferred from Chatinka to the  
198 PICU/HDU if surgical procedure is required, these wards are furthermore already linked by a  
199 clear transmission path via patients, and several potential between-ward transmission events  
200 are indicated in particular in ST35 and ST14/15 (Fig 3D, F).

201  
202 Over the period from 2015-2018 there was an increased focus on performing blood cultures  
203 to ensure every neonate on Chatinka nursery that met the clinical criteria for suspected  
204 neonatal sepsis was included, which may explain some of the large increase in *Kpn* cases in  
205 2017 on the nursery. Establishing optimal IPC has been an ongoing challenge(21);  
206 specifically, handwashing has been difficult due to intermittent water supply and a lack of  
207 access to soap or hand sanitiser and there are limited numbers of cots, so neonates have  
208 often shared them. In response to the large increase in *Kpn* cases there was renewed focus  
209 on IPC; hand sanitizer and soap procurement was prioritized, deep cleans of the ward  
210 environment were performed regularly, there was increased cleaning of ward surfaces, ward  
211 traffic was limited, wooden cots are being replaced with easier to clean plastic ones, the  
212 number of neonates sharing a cot was reduced and oxygen delivery devices are being  
213 replaced with single use items.

214

## 215 **Antimicrobial resistance and implications for treatment**

216 Phenotypic resistance profiles of the strains, where available, mirrors the very concerning  
217 trends reported previously for *Kpn* in QECH(3) (Fig S4, Table S4). Resistance against the  
218 frontline treatments is widespread; a particular concern is a high proportion of isolates with  
219 ceftriaxone, gentamicin and cotrimoxazole resistance from 2012 onwards with very little  
220 change over time (Fig S4A-C; >75% of tested isolates were resistant to these agents each  
221 year 2012 – 2020). We notice some variation in co-amoxiclav (augmentin: amoxicillin +  
222 clavulanic acid) susceptibility profiles but from 2019 again show >75% of tested isolates as  
223 resistant (Fig S4A). Importantly, we notice that a trend of increased numbers of  
224 chloramphenicol susceptible isolates (Fig 4B, Fig S4G), which has previously reported in  
225 Malawi(3), is also explicit in our *Kpn* collection in particular in recent isolates (38.7%, 51.5%,  
226 72.2% isolates sensitive for 2018-2020). Presence of *catA1* or *catA2* agree well with  
227 phenotypic resistance whereas presence of *catB4* did not as shown in Fig 4B; where we see  
228 a large number of isolates with sensitive phenotype, no *catA1/2* but *catB4*, whereas only a  
229 small fraction of isolates has resistant phenotype, no *catA1/2* but *catB4* where we hypothesize  
230 a different mechanism is likely driving the resistant phenotype. For isolates with resistant  
231 phenotype and encoding both *catA1/2* and *catB4* the resistance is presumed to be driven by  
232 *catA1/2*. This agrees with *catB4* representing a non-functional truncated variant of *catB3* as  
233 was recently reported. We furthermore note a sensitivity of 50% or higher in the majority of  
234 years measured in ciprofloxacin (6/9 years from 2012 to 2020, including 2017, 2018 and 2020;  
235 Fig S4E, Table S4), which together with chloramphenicol thus represent two antimicrobials  
236 that might thus be valid treatment options.

237

238 Resistance to 3GC was widespread (83% resistance to cefpodoxime/ceftriaxone by 2020; Fig  
239 S4A) and almost exclusively driven by acquisition of the *bla*<sub>CTX-M-15</sub> gene, which continuously  
240 outcompetes other ESBL-encoding genes that are occasionally present in the *Kpn* population,  
241 but which are only sporadically detected (Fig 4A, Table S2). The number of plasmid replicons  
242 per isolate stabilised after the first increase in numbers around 2015, highlighting that a few  
243 large AMR plasmids are likely responsible for the majority of AMR-isolates (Fig S5C, Fig S6A,  
244 Table S3). Strains with a moderate number of plasmid replicons dominate the population (0-  
245 5) and this remains stable over time, with only a small number of isolates with more than five  
246 plasmid replicons associated that remains at similar numbers over time (Fig S6A). This  
247 indicates that the change to a predominantly ESBL<sup>+</sup> population was the key event, with the  
248 population then remaining stable over time with respect to plasmid diversity and numbers of  
249 resistance genes (Fig S6B).

250

251 Carbapenem resistance genes are still only rarely observed; we identified two samples  
252 encoding for *bla*<sub>NDM-1</sub>; one in a ST39 in 2016 and one in a ST45 in 2019, perhaps unsurprisingly  
253 as carbapenem usage is still comparatively unusual. We also investigated resistances against  
254 other potential alternative treatment options colistin, fosfomycin and tigecycline. Resistance  
255 to these agents are all at low levels, with only one acquired fosfomycin resistance gene  
256 detected (*fosA*) and none against colistin or tigecycline predicted in our dataset, and one  
257 isolate with predicted mutations that can confer resistance to colistin (*pmrB*), indicating that  
258 these might be viable alternatives for ESBL<sup>+</sup> infections at QECH, although tigecycline is  
259 contraindicated in children under 8y (Table S2) and neither agent may not be ideal treatments  
260 for bacteraemia(22,23). Tigecycline resistance is often conferred by upregulation of transport  
261 proteins and thus challenging to predict and has also been observed during within-patient

262 evolution(24–26); we could however not detect the described plasmid-derived antimicrobial  
263 resistance genes *tetX* in our collection(27).

264

265 Based on AMR phenotype identified by disc diffusion, amikacin remains a viable alternative  
266 to gentamicin, although there are concerns over blood brain barrier penetration in cases of  
267 meningitis and renal toxicity in settings where therapeutic drug monitoring is not possible.  
268 Phenotypic data are corroborated by a more detailed analysis of the aminoglycoside AMR  
269 genes (Fig 4C and 4D). In total 90.5% of all isolates (1243/1373) are predicted to encode one  
270 or more aminoglycoside resistance genes, however, the majority are predicted to confer  
271 resistance to streptomycin (ANT3) and gentamicin (AAC(3)-II; ANT(2'')-I; Fig 4D). Only a  
272 fraction of these strains (43.2%, 593/1373) encoded one of the genes predicted to confer  
273 resistance against amikacin (AAC(6')-I; Fig 4C). Aminoglycoside resistance is known to be  
274 challenging to predict(28); whilst phenotypic gentamicin resistance testing matches very well  
275 with the predicted profile based on acquired genes, the presence of AAC(6')-I does not by  
276 itself confer resistance in a large number of isolates, with only 12 isolates encoding for either  
277 of these, representing 2%, actually showed a resistant phenotype (Fig 4D; Table S4).

278

### 279 **Potential vaccine target stability**

280 The *Kpn* polysaccharide antigens are of high interest as vaccine targets; in particular the large  
281 capsular antigen. As expected, we observed a very high number of different K-loci (90  
282 predicted), as well as a diverse set of O-loci (15 predicted), the latter are known to be far less  
283 diverse in *Kpn*(29). Recent findings furthermore showed that *wbbZ*, encoded on the  
284 chromosome outside the O-locus, contributes to the diversity of the O-Ag structure displayed  
285 by *Kpn* and thus two isolates with the same O-locus can still result in different O-types based  
286 on the presence or absence of this gene. Immunologically relevant differences in O-Ag thus  
287 requires the prediction of the O-Ag locus and *wbbZ*(30), so we added this to our O-Ag type  
288 predictions (Fig S7A-D) where we thus distinguish between O1a and O1b as described by  
289 Kelly *et al*(30). Reflecting the trend observed with the ST types, we observe temporal variation  
290 in prevalence of O-types and K-types (Fig 5A and 5D, Fig S7A). The non-ESBL population  
291 again displays a much greater diversity for both types of antigen (Fig 5B and 5E, Fig S7B),  
292 whilst the ESBL population is more biased towards dominant O- and K-types (Fig 5C and 5F,  
293 Fig S7C).

294

295 Beyond the dominant O1b (821/1373; 59.8%) and O2afg (184/1373; 13.4%) predicted O-  
296 antigen types, the infrequently observed type O4 comprises a substantial fraction of isolates  
297 (90/1373; 6.6%); and 35 isolates have a prediction accuracy as “Low” or “None” which can  
298 indicate either low assembly quality or novel O-Ag loci and types. In addition, we note two  
299 isolates with unknown O-Ag locus encoding for additional *wbbY* and *wbbZ* genes, indicating  
300 that more variation might be within possibly novel O-Ag loci depending on additional enzymes  
301 encoded in the chromosomal backbone (Table S5). We furthermore note 8 isolates with  
302 O1/O2 loci encoding for only *wbbZ* (not *wbbY*); whilst the recent work showed no structural  
303 differences in the O-Ag if *wbbZ* alone was added, we cannot exclude other carbohydrate  
304 enzymes on the chromosomes of our isolates that might lead to additional different structures  
305 if combined with *wbbZ* (Table S5). Of relevance, we also observe variation of O- and K-type  
306 combinations within the same sequence type (Fig 5G and H, Fig S7D) and with each other  
307 (Fig 5I, Fig S7E).

308



309 Considering hypothetical vaccine strategies and constructs, an efficacious maternally  
310 administered quadrivalent O-antigen based vaccine (O1a, O1b, O2afg, O4; including O1a as  
311 O1b-encoding isolates can switch between O1a and O1b(30)) would be expected to protect  
312 against up to 89% of cases of neonatal sepsis in Blantyre (345/388), whereas a K-antigen  
313 based vaccine would require 22 K-antigens to be represented to protect against an equal  
314 number of cases of neonatal sepsis when taking the entire timespan of our study into account  
315 (KL10, KL102, KL103, KL104, KL106, KL108, KL117, KL142, KL15, KL16, KL17, KL19, KL2,  
316 KL23, KL25, KL30, KL43, KL48, KL51, KL52, KL62, KL9); a quadrivalent K-antigen based  
317 vaccine (KL2, KL25, KL30, KL102) would cover 58% (198/388) of cases. We furthermore  
318 observe no regular cycling between a specific set of K-types, but rather that different K-types  
319 regularly emerge associated with major clones (Fig 5). Given current knowledge of >180  
320 predicted K-types(31) and >70 determined structures so far(32–34) (likely an  
321 underestimation), and the propensity of the K-locus to recombine, it will be very challenging  
322 to predict how long a K-type vaccine would remain effective.

323

### 324 **Trends of resistance vs virulence determinants**

325 Whilst most *Kpn* isolates are opportunistic pathogens with poorly understood virulence  
326 profiles, the hypermuroid phenotype is a known virulence determinant arising from  
327 hyperproduction of capsule and causing a different clinical infection type, i.e. liver abscess  
328 and meningitis in otherwise healthy individuals, often progressing very rapidly and with poor  
329 prognosis. The capsule hyperproduction is usually driven by acquisition of a virulence plasmid  
330 encoding for the capsule polysaccharide upregulation factor *rmpA2* as well as several  
331 siderophore systems (aerobactin, salmochelin, colistin) that enable iron scavenging. This  
332 phenotype is of particular concern given the recent convergence of hypervirulent with  
333 multidrug resistant isolates. Whilst we note hypervirulent isolates present (defined here as  
334 kleborate virulence score >1, i.e. encoding virulence factors in addition to the often  
335 chromosomal yersiniabactin) from the very early sampling times on in our collection (Fig  
336 S8A,B, Fig S5B), these remain sporadic; in contrast to multidrug resistant isolates (Fig S8C,D  
337 Fig which are absent at these early sampling times but rapidly become the majority of isolates  
338 from 2007/8 onwards (Fig S8D). Whilst we note a total number of >10 isolates for both ST86  
339 and ST268, two STs carrying the *rmpA2* gene and widely observed as hypervirulent  
340 phenotypes, these occur in different years and wards, highlighting that hospital-derived  
341 transmission is highly unlikely (Fig S8B). Whilst it is of concern that we observe some of these  
342 potentially hypervirulent isolates (encoding for *rmpA2*) also encoding an ESBL gene (22 total;  
343 9 of these ST86, no ST268) there seems to be no selective advantage; the first isolate carrying  
344 this combination is observed in 2010 but a maximum of 4 isolates per year are observed until  
345 2020. This small number of putative hypervirulent isolates is in accordance not only with  
346 bloodstream isolates in general but also with a study comparing carriage with infectious  
347 isolates from adults in Blantyre, where only a very small number of isolates encoding virulence  
348 determinants were identified, all of them in infectious isolates(35,36).

349

### 350 **Discussion**

351 Neonatal sepsis is responsible for a high proportion of deaths in children under 5 in sSA, with  
352 *Klebsiella* by now being both the most prevalent gram-negative pathogen and increasingly  
353 hard to treat. We have analysed a longitudinal collection of routine diagnostics invasive  
354 (bloodstream and CSF) isolates of *Kpn* spanning from 1998 – 2020, during which time AMR  
355 increased drastically. We determined longitudinal patterns of patient demographics, *Kpn*  
356 population trends, vaccine targets, resistance elements and remaining treatment options. This

357 exceptional resource, not only for sSA but also world-wide, enables us to understand the  
358 dynamics of *Kpn* over an exceptionally long time scale where the sampling was not biased  
359 towards resistance types. In particular, it allows us to see the dynamics before, during, and  
360 after the significant expansion of ESBL producing *Kpn* at maximum resolution; and highlights  
361 the need to consider not only major types based on total numbers but the temporal dynamics  
362 of vaccine targets such as cell surface polysaccharides.

363  
364 *Kpn* initially showed a bimodal age distribution in patients at QECH(3) and there were  
365 concerns that increasing life expectancy would lead to a higher number of adult infections;  
366 however, this trend has yet to be seen, and adult bloodstream infections were significantly  
367 reduced overall following the widespread distribution of antiretroviral therapy(37). The stark  
368 increase in infections from 2016 onwards is almost exclusively seen in neonates and children  
369 where ward-restricted clonal expansions that are subsequently replaced with other successful  
370 clones. This suggests that context appropriate, effective, scalable infection prevention and  
371 control (IPC) targeted towards the most vulnerable patient groups in the hospital and a better  
372 understanding of *Kpn* transmission routes and reservoirs would prevent a large proportion of  
373 the cases caused by *Klebsiella* bloodstream infection. Such approaches have the potential to  
374 protect vulnerable babies against all healthcare associated infections rather than just one  
375 pathogen and are available now, unlike a vaccine strategy that will take years to develop and  
376 implement without guarantee for success.

377  
378 The main sequence types in our study were ST39, ST14 and ST15. While ST39 and ST14  
379 are not necessarily the most prevalent ones observed globally, ST15 is widely reported in  
380 SouthEast Asia causing clonal outbreaks whereas it showed a different pattern in our setting  
381 driving smaller expansions but also as a lot of sporadic isolates occurring over time. This  
382 highlights the need for more data from sSA to understand the complex diversity of this  
383 organism in high-risk areas, as not only the ST composition, but also their patterns, differ  
384 between settings. The two key insights we gain from the population pattern is that the lineages  
385 continue to replace each other as the dominant clone over longer time periods, and that in our  
386 setting, this expansion is mainly driven by an increase in cases in neonatal patients. Most of  
387 the major sequence types are present at a steady, much lower proportion, before and after  
388 their respective clonal expansions, emphasizing the relevance of understanding what leads to  
389 the wave-like pattern of clonal expansions in *Kpn* populations.

390  
391 This temporal variability also favours prioritisation of IPC strategies to prevent the introduction  
392 of new lineages. It may be that increased IPC efforts in response to ward outbreaks contribute  
393 to or are the single cause for the sudden stops of clonal expansions. We have little  
394 understanding of the ability of *Kpn* to survive on abiotic surfaces, which represents one of the  
395 key differences between HIC and LMIC settings, as the latter often use wooden furniture and  
396 bristled plastic tubing due to limited resources, which might lead to different *Kpn* lineages  
397 being successful. A similar question remains open regarding agents used for disinfection, as  
398 resource-limited settings often rely on basic soap agents and use unsafe water, whilst HIC  
399 routinely use industrially produced, quality controlled disinfectants.

400  
401 Our data allow insight into AMR patterns in our setting. Ceftriaxone resistance, almost  
402 exclusively due to the ESBL-encoding *bla*<sub>CTX-M-15</sub>, is widespread. Whilst carbapenems are  
403 rarely available and resistance is already emerging (38,39), several treatment options are still  
404 viable, such as amikacin. Our analysis also emphasizes again that aminoglycoside resistance

405 is notoriously hard to predict and might be impacted by the genetic background (for example  
406 efflux pumps) and not only acquired resistance genes, and should therefore at this stage not  
407 be ruled out based on genomic data but confirmed via phenotyping. Most isolates were  
408 phenotypically resistant to gentamicin; whether this is consequent on the predicted resistance  
409 genes, or whether other mechanisms drive this resistance is important to determine to improve  
410 the value of genotypic predictions for aminoglycosides. It will remain to be further investigated  
411 whether this is due to other interfering genes or low expression of the resistance gene and  
412 might be an indication of heteroresistance in the population which needs to be carefully  
413 considered(40). We furthermore observe a trend in re-emergence of chloramphenicol  
414 sensitivity, putatively in part driven by the spread of a non-functional CAT copy. Continuing to  
415 monitor re-emergence of susceptibility to agents no longer in use is of high relevance to allow  
416 timely re-introduction of drugs and can give us insights into the potential of rotating  
417 antimicrobial regiments over longer time spans to allow sensitivity to re-emerge.

418

419 There was little resistance predicted and observed to colistin, a last-line treatment option, in  
420 QECH *Kpn* isolates. Especially the lack of mobile resistance elements is encouraging, but  
421 also stresses the urgent need for better management of animal health as colistin is widely  
422 used, knowingly and as part of food products farmers are not necessarily aware of, in the  
423 increasing mid-size farming industry(41). Another exciting new development are initial results  
424 of combining fosfomycin and flomoxef(42); we observe only sporadic fosfomycin resistance  
425 mechanisms and very little spread of *ampC* genes, the only non-carbapenemases that would  
426 deactivate flomoxef, although we note that there are also counterindications for fosfomycin  
427 use in invasive infections.

428

429 As extensively resistant bacterial pathogens emerge and spread, there is an increasing  
430 urgency to develop vaccines to break the arms race between new antimicrobials and new  
431 resistance mechanisms. In this case there is interest in developing maternally administered  
432 *Klebsiella* vaccines to prevent neonatal sepsis. A target of high interest are the extracellular  
433 polysaccharides that can be typed based on their respective operons, which are assigned  
434 different K-types (capsular antigen) and O-types (the lipopolysaccharide O-antigen chain).  
435 The K-antigen shows a very high diversity; and whilst we can identify several dominant types  
436 in our study, the long timeframe of our study highlights the importance of considering the  
437 dynamic nature of K-antigens when considering vaccine design. Here, temporal fluctuations  
438 detected just in Blantyre strongly suggest that a K-type vaccine would become ineffective very  
439 rapidly given the frequent changes in dominant K-type, which might be driven by phage  
440 pressure in the environment and thus highly unpredictable. It is also unclear if successful  
441 vaccination against the major polysaccharide types would lead to a degree of cross protection  
442 against non-targeted types or whether lack of such cross protection would facilitate rapid  
443 emergence of infections caused by vaccine escape lineages.

444

445 In contrast, there are far fewer O-antigen types, making this a more attractive target. Recent  
446 efforts have compared several large datasets with O- and K-typing either determined by PCR  
447 or WGS(43); and identified that a conjugate vaccine targeting O1v1/2 (~serotype O1)(31),  
448 O2v2 (~serotype O2afg)(31) and O3b (~serotype O3b)(31) has the potential to prevent the  
449 majority (>70%) of cases of *Kpn*-BSI. For the most at-risk population in our setting, the  
450 neonates, this would cover 87% of cases (338/388) assuming O1a and O1b were included  
451 into O1 and no other subtypes were discovered(30); importantly it would however not have  
452 prevented the ST340 outbreak in the neonatal unit previously described(15) (O4). It thus

453 seems of relevance to consider including the currently low-abundance O-antigens as well, in  
454 particular given the interchangeability for O-types within the same STs. Reports from other  
455 highly understudied settings also report other main O-types in hospital isolates, e.g. O5 in a  
456 study in Pakistan(17,44) or a diversity of O-types in the Caribbean where this O-Ag vaccine  
457 would only cover 62% (162/260) (45). Selection pressure might not directly drive evolution  
458 given that *Kpn* is not human restricted but could likely select for strains with currently less  
459 abundant O-types to increase in prevalence. Further, there remains an open question of how  
460 accessible the O-antigens are to antibodies, which a recent study calls into question(46); we  
461 currently have very limited understanding what drives the extent of capsule expression per  
462 cell in non-hypermucoid isolates and how different stages of the infection impact this. It is  
463 known from *in vitro* studies that capsule expression even in the same experimental setting can  
464 differ widely within clonal lineages, which also impacts the bacterial ability to escape the  
465 complement system(47).

466

467 Our data, and the recent identification of a novel form of the long-studied O1 antigen  
468 type(30,48–50), highlights that we have very little understanding of the relevance of the O-  
469 and K-types on the success of *Kpn* lineages, whether any additional genes on the  
470 chromosomal backbone can further modify the structures and lead to different serotypes with  
471 the same O-locus, as well as whether any O-/K-combinations are more or less favourable.  
472 Closing such knowledge gaps will be central to design of vaccines as we also have little  
473 understanding for the propensity of sequence type combinations with specific vaccine target  
474 serotypes such as capsule or O-antigen. A more solid understanding of O-/K-type variations,  
475 both regarding their biochemistry and whether they contribute to epidemiological success, is  
476 crucial given the high interest to use these as targets for maternally administered vaccines  
477 against neonatal sepsis.

478

479 This highlights that we have very little understanding of the relevance of the O- and K-types  
480 on the success of *Kpn* lineages, whether any additional genes on the chromosomal backbone  
481 can further modify the structures and lead to different serotypes with the same o-locus, as well  
482 as whether any O-/K-combinations are more or less favourable. A more solid understanding  
483 of O-/K-type variations, both regarding their biochemistry and whether they contribute to  
484 epidemiological success, is crucial given the high interest to use these as targets for  
485 maternally administered vaccines against neonatal sepsis.

486

## 487 **Conclusions**

488 In summary, our study provides a unique insight into long-term patterns of *Kpn* hospital  
489 isolates from a low-income setting, spanning across a time period where the number of MDR  
490 and ESBL producing infections increased rapidly across the globe. We show that whilst STs  
491 known as high-risk in other settings are common, these do not always show similar success  
492 in different settings; and we observe a significant numbers of isolates from otherwise rarely  
493 observed STs, causing hospital infections. This again emphasizes the importance of including  
494 the relevant settings into studies aiming to identify treatment or vaccine targets as we currently  
495 have poor understanding of what makes an ST a high-risk lineage in each setting at a given  
496 time. Our data also emphasizes the urgent need to consider temporal variation when  
497 considering treatment or vaccine targets, as some of the main vaccine targets show strong  
498 temporal fluctuations; the most prevalent type now circulating is unlikely to cause the next  
499 outbreak. The close relatedness of isolates from the same ward in the same time frame  
500 strongly indicate that the majority of infections are hospital-acquired, so whilst vaccine

501 development and alternative treatment options are highly relevant; at this stage, focused  
502 efforts to improve IPC are key to reducing *Kpn* disease burden now(21).

503

## 504 **Methods**

### 505 **Isolate collection**

506 QECH is a government run tertiary referral centre for the southern region of Malawi, which  
507 provides free care at the point of delivery. It serves a population of 800,000 for the area of  
508 urban Blantyre (Malawi census 2018). There are adult and paediatric A&Es, medical and  
509 surgical wards. There is a tertiary neonatal unit on site and a separate paediatric surgical  
510 hospital which opened in 2017 (Figure 2C; PICU, Paediatric HDU, Paediatric surgical ward).

511

### 512 **Microbiological sampling and processing**

513 Routine, (ISO15189 accredited since 2019) diagnostic blood culture services have been  
514 provided to the medical and paediatric wards by the Malawi-Liverpool-Wellcome Programme  
515 since 2000. For adults 7-10mL of blood were collected from all patients admitted to the hospital  
516 with fever (axillary temperature  $>37.5^{\circ}\text{C}$ ) or clinical suspicion of sepsis, severe sepsis, or  
517 septic shock. Sepsis, severe sepsis, or septic shock were suspected in patients with  
518 tachycardia ( $\geq 90$  beats per minute), hypotension (systolic blood pressure  $< 90$  mm Hg),  
519 tachypnoea (respiratory rate  $> 20$  per minute), or delirium. 3–10 mL of blood was taken from  
520 children with non-focal febrile illness who tested negative for malaria, who were severely ill  
521 with suspected sepsis, or who failed initial malaria treatment and remained febrile. For adults  
522 and children with clinical suspicion of meningitis (temperature  $> 37.5^{\circ}\text{C}$  with seizures,  
523 headache, abnormal behaviour or meningism) a lumbar puncture was also performed and the  
524 sample sent for CSF analysis. For neonates with clinical signs of sepsis or meningitis  
525 (temperature  $> 37.5^{\circ}\text{C}$ , or other signs of clinical deterioration such as reduced activity,  
526 increasing work of breathing or respiratory rate  $> 60$ , heart rate  $> 180$  or  $< 100$ , and unexplained  
527 seizures) a blood culture and CSF sample was collected. Afebrile patients were unlikely to  
528 have had blood or CSF cultures unless the clinical suspicion for sepsis or meningitis was high.

529

530 For blood cultures, samples were collected using aseptic methods and inoculated into a single  
531 aerobic bottle (BacT/Alert, bioMérieux, Marcy-L'Etoile, France). These were incubated using  
532 the automated BacT/Alert system (bioMérieux, France) since 2000. Before which, they were  
533 cultured manually. Samples that flagged positive were Gram stained and Gram-negative  
534 bacilli are identified by Analytical Profile Index (Biomérieux). CSF samples were processed  
535 for cell count and biochemistry before manual culture. Antimicrobial susceptibility testing was  
536 determined by the disc diffusion method (Oxoid, United Kingdom) using AST breakpoints that  
537 were current at the time, initially following the relevant version of the British Society of  
538 Antimicrobial Chemotherapy's guidelines until 2018, after which time EUCAST methods and  
539 breakpoints were introduced. Organisms which showed reduced inhibition when exposed to  
540 Ceftriaxone 30mg discs, Ceftriaxone 5mg discs, or Cefpodoxime 10mg discs were classified  
541 as resistant to Ceftriaxone. Intermediate isolates were classified as resistant to ceftriaxone.  
542 Details for the identification of other organisms are described elsewhere(3). *Klebsiella*  
543 *pneumoniae* isolates were stored at  $-80^{\circ}\text{C}$  on microbank beads.

544

### 545 **Whole genome sequencing and QC**

546 All *Klebsiella pneumoniae* isolates that could be recovered from the start of the MLW archive  
547 to April 2020 were thawed and incubated on MaConkey's media for 18-24 hours at  $37^{\circ}\text{C}$ .  
548 Plates with pure growth then had a single colony pick taken and inoculated into 15 ml of

549 buffered peptone water for 18-24 hours at 37°C. These samples were then centrifuged and  
550 the supernatant was discarded. The pellet was then resuspended in buffer and the DNA was  
551 extracted using the QIA Symphony machine and QIA Symphony DSP kit with onboard lysis,  
552 according to the manufacturer's instructions. Quality control was done using Qubit and  
553 samples with a DNA volume of less than 200ng were repeated. DNA was sequenced at the  
554 Wellcome Sanger Institute on the Illumina HiSeq X10 instrument (Illumina Inc., United States)  
555 to produce 150 bp paired end reads.

556  
557 Eleven out of 1313 samples failed the Sanger-internal sequencing threshold for minimum  
558 coverage for assemblies and were thus removed from further analyses. Quality control on all  
559 remaining isolates was performed using species confirmation via Kraken v0.10.6(51) to  
560 identify contaminants (incorrect species). Any species assignment other than *Klebsiella*  
561 *pneumoniae*, *Klebsiella variicola*, unclassified and synthetic construct were considered  
562 contaminants; the latter two categories frequently derive from plasmid sequences in our  
563 experience. All isolates with higher than 10% of other species were removed as contaminated  
564 (Fig S2A). Similarly, isolates with a ratio of heterozygous SNPs over 5% were removed as  
565 likely contaminated by a related strain (Fig S2B). Further quality control used the assemblies,  
566 where all isolates resulting in more than 1000 contigs were removed as likely contaminated  
567 by other species or strains, or of very low quality (Fig S2C). *De novo* assembly of the remaining  
568 1156 genome sequences was performed using SPAdes v3.14.0(52) incorporated into the  
569 bacterial genome assembly pipeline described previously(53). Annotation of all assemblies  
570 was performed using prokka(54) v1.14.5.

571

## 572 **Genome analyses and phylogenetics**

573 For comparative analyses, isolates from recent studies at QECH were included, as they are  
574 part of the bloodstream collection(14–16). Details of all sequences used in the analyses are  
575 given in supplementary table 1. Resistance gene prediction and plasmid replicon types were  
576 performed using arima(55) (v2.14.6) and the srst2-argannot(56,57), CARD(58) and  
577 plasmidfinder(59) databases (download date 14.02.2022). To assess aminoglycoside  
578 resistance; ANT3 is by arima as AacAad\_AGly, AadA4\_5\_AGly, AadA\_AGly, AadA\_AGly\_2,  
579 AphA6\_AGly; AAC(3)-II is grouped by arima as Aac3\_Ila\_AGly; ANT(2'')-I is grouped by arima  
580 as AadB\_AGly and AAC(6')-I is grouped by arima as AacAad\_AGly\_3.

581

582 Prediction of sequence types, (sub)species and *Klebsiella*-specific virulence factors were  
583 performed using kleborate v2.1.0(60) and the `-r` setting; the results are given for all isolates  
584 in Table S1. O- and K-types were predicted with kaptive(31) (v2.0.6) which incorporates O-  
585 loci as well as O-serotype prediction(29,31,61); and we added an additional option of *wbbZ*  
586 as extra gene to distinguish between O1a (O1/O2 + *wbbY*, no *wbbZ*) and O1b (O1/O2 + *wbbY*  
587 + *wbbZ*) as described recently(30), adding *wbbZ* as implemented in kaptive versions before  
588 v2(61) and expanding the .logic file to distinguish O1a/b.

589

590 Core genome SNPs for *K. pneumoniae* subsp. *pneumoniae* isolates were determined using  
591 snippy(62) (v4.6.0; <https://github.com/tseemann/snippy>) with the *Klebsiella pneumoniae*  
592 subsp. *pneumoniae* NTUH-K2044 genome (AP006725.1)(63) as reference. Recombinant  
593 regions were removed using gubbins(64) (v3.2.1) and the FastTree(65) option ('-tree-builder  
594 fasttree'), given the very high number of samples, as implemented in gubbins; and only  
595 isolates from sequence types with more than one isolate in our dataset were included in the  
596 analysis to further reduce compute time. The same strategy was used for *K. quasipneumoniae*

597 and *K. variicola* using strains ATCC 700603 (CP029597.1)(66) and At-22 (CP001891.1)(67)  
598 as reference, respectively, where all isolates were included and default options for gubbins  
599 were used (RaxML for tree generation, given the much smaller sample numbers). A snp-only  
600 alignment was generated from the recombination-free gubbins output using snp-sites(68)  
601 v2.5.1 with the -c option (selecting for ACGT-only) for *K. quasipneumoniae* and *K. variicola*;  
602 for *K. pneumoniae* subsp. *pneumoniae*, given the high variation of isolates, the -c option was  
603 too stringent (resulting in a <200 bp alignment) and we thus used snp-sites to isolate all snps  
604 but without selecting for ACGT-only sites.

605  
606 The snp-only alignments were used as input for iqtree(69) (v1.6.12), the number of constant  
607 sites was determined with snp-sites -C function from the original full alignment and provided  
608 to the '-fconst x,x,x,x' iqtree function. The model was determined with the integrated  
609 ModelFinder(70) function '-m TEST' resulting in GTR+F+I+G4, GTR+F+I+G4, TVM+F+I+G4,  
610 for the alignments from *K. pneumoniae*, *K. quasipneumoniae* and *K. variicola*, resp. We set '-  
611 keep-ident' to keep identical data and '-bb 1000' for 1000 ultrafast bootstrap replicates. The  
612 resulting trees were then adjusted to SNP-length branch lengths using the python  
613 implementation of pyjar(71) (<https://github.com/simonrharris/pyjar>) as input for rPinecone(19).  
614 Closely related clusters taking their phylogenetic distance into account were determined with  
615 5 SNPs as cut-off for minor and 10 as cut-off for major clusters. These were visualised with  
616 iTol(72) (v6.8) with visualisation files generated as implemented in rPinecone(19). For ST35,  
617 ST39 and ST14/15 (combining ST14 and ST15 isolates in one analysis) we performed ST-  
618 specific mappings of all respective isolates against references from these sequence types to  
619 gain higher resolution (CP041353.2(73), LR991401.1(74) and CP008929.1(75), resp.).

620  
621 Pan-genome reconstruction, generation of a core gene alignment, and identification of  
622 neighbouring gene regions were derived via panaroo(76) (v1.3.3) using the '-clean-mode  
623 strict' setting. The phylogenetic tree based on the core gene alignment, with informative sites  
624 extracted with snp-sites as above, was calculated using iqtree(69) (v1.6.12) and the internal  
625 ModelFinder(70) function (GTR+F+ASC+G4) as above. All other metadata summary analyses  
626 and visualisation were generated using the ggplot(77) and ggtree(78) packages in R(79)  
627 unless indicated otherwise; some colour schemes are derived from or inspired by the  
628 MetBrewer (<https://github.com/BlakeRMills/MetBrewer>) and NationalParks  
629 (<https://github.com/katiejolly/nationalparkcolors>) R libraries. Composite figures were  
630 generated using the patchwork package (<https://github.com/thomasp85/patchwork>). An  
631 RMarkdown file to generate the analysis plots and the underlying tree and data files are freely  
632 available online (<https://github.com/EvitaH/QECHospitalKlebs>; doi:  
633 10.5281/zenodo.8421658).

634  
635

### 636 **Data availability**

637 All sequence data is available on SRA/ENA under BioProject PRJEB42462; specific  
638 accessions and all additional data is provided in the supporting tables S1-S5. All data and  
639 code used to create the analyses and is available as R package QECHospitalKlebs v0.0.9  
640 (<https://github.com/EvitaH/QECHospitalKlebs>; doi: 10.5281/zenodo.8421658).

641

### 642 **Acknowledgments**

643 We would like to thank the Sanger Institute Pathogen Genomics group for expert  
644 computational support. We acknowledge and thank all the clinical staff and patients at QECH

645 over the years for their contribution; and the MLW core microbiology team for expert support  
646 in storage and handling of the isolates.

647

### 648 **Funding**

649 We acknowledge funding from Wellcome (EH; grant 217303/Z/19/Z) and the BMGF (NAF and  
650 EH; grant INV-005180) as well as Wellcome funding providing core support for the Wellcome  
651 Sanger Institute (206194) and MLW (206454). The funders had no role in study design, data  
652 collection and analysis, decision to publish, or preparation of the manuscript.

653

### 654 **Ethics statement**

655 Ethical approval for this study was granted by the University of Malawi College of Medicine  
656 Research Ethics Committee (COMREC) (P.11/18/2541) and isolates were shipped under a  
657 Nagoya Protocol compliant Access and Benefit Sharing agreement between the Government  
658 of Malawi and the Wellcome Sanger Institute.

659

### 660 **Competing interests**

661 The authors declare no competing interests.

662

### 663 **Author contributions**

664 Conceptualization: *EH, NAF*; Methodology: *EH, NAF*; Software: *EH, JML*; Validation: *EH, OP,*  
665 *AZ*; Formal analysis: *EH, OP*; Investigation: *EH, OP, AZ, PM, PS, ET, FG, RL, SL, JC, JML*;  
666 Resources: *SB, PS, ET, KK, NRT, NAF*; Data curation: *EH, OP, PM, RL, JC, JML, AZ*;  
667 Writing—original draft: *EH, OP, NAF*; Writing—review & editing: *all authors*; Visualization: *EH,*  
668 *OP, JML, NAF*; Supervision: *EH, CM, SL, KK, NAF*; Project administration: *EH, NAF*; Funding  
669 acquisition: *EH, NRT, NAF*

670

### 671 **Figure legends:**

672 **Fig 1. *Kpn* cases at QECH. (A)** Numbers of *Kpn* cases per year at QECH. Bars represent the  
673 crude frequency of *Kpn* infection for each year from 1998 - 2021, with the different colours  
674 representing the different age groups of the patients. **(B)** Blood culture positivity rate (per 1,000  
675 blood cultures) of *Kpn* in neonates and the entire patient population.

676 **Fig 2. Uneven distribution of STs and cases at QECH wards indicate hospital-acquired**  
677 **infections. (A)** Main STs and **(B)** wards the samples were derived from over time. **(C)** A  
678 schematic map of QECH with the wards samples of our study were derived from highlighted.  
679 AETC – Adult emergency and Trauma Centre; Paediatric A&E – paediatric accident and  
680 emergency; PICU – paediatric intensive care unit; HDU – high dependency unit.

681 **Fig 3. Most cases suspected to be caused by within-ward transmissions.** Mapping trees  
682 against reference genomes for **(A)** *K. pneumoniae* subsp. *pneumoniae* excluding STs  
683 represented with only a single isolate in the dataset, **(B)** *K. quasipneumoniae* and **(C)** *K.*  
684 *variicola*. **(D-E)** show ST-specific mapping of the relevant isolates against references for ST35  
685 **(D)**, ST39 **(E)**, ST14/ST15 **(F)**. The coloured tips indicates isolates with <5 SNPs distance to  
686 their nearest neighbour based on a root-to-tip approach to identify related clusters of  
687 isolates(19). The colour ring in **(A)** shows the main STs, the columns in **D-F** show year of  
688 isolate (left column) and major ward (right column).

689 **Fig 4. Resistance mechanisms only explain beta-lactam, not aminoglycoside,**  
690 **phenotypes. (A)** The distribution of ESBL genes over time illustrating the dominance of *bla*<sub>CTX-</sub>  
691 *M-15*. **(B)** Phenotypic chloramphenicol resistance profiles proportional over time and the  
692 presence or absence of *catA1* and/or *catA2* compared to *catB4*, the recently re-characterised



693 non-functional CAT enzyme. **(C)** and **(D)** Predicted aminoglycoside resistance was based on  
694 the presence of an Aac6'-Ib-cr or Aac6'-Ib gene (AAC(6')-I) for amikacin and Aac3\_Ila  
695 (AAC(3)-II) or AadB (ANT(2'')-I) for gentamicin. The x-axis shows the samples based on  
696 phenotypic resistance profiles (intermediate, sensitive, resistant) against **(C)** amikacin and **(D)**  
697 gentamicin, and the bars show number of isolates in the respective category that would have  
698 been predicted as sensitive (blue) or resistant (red) based on the genes as above.

699 **Fig 5. High fluctuation of putative vaccine targets over time and diversity within major**  
700 **STs.** The distribution of O-Ag locus types (top panels) and K-locus types (lower panels), resp.,  
701 over time showing total numbers **(A)** and **(D)**, only isolates with ESBL resistance genes **(B)**  
702 and **(E)** or ESBL-negative isolates **(C)** and **(F)**.

703

## 704 References

- 705 1. Liu L, Oza S, Hogan D, Chu Y, Perin J, Zhu J, et al. Global, regional, and national causes  
706 of under-5 mortality in 2000-15: an updated systematic analysis with implications for the  
707 Sustainable Development Goals. *Lancet Lond Engl.* 2016 Dec 17;388(10063):3027–35.
- 708 2. Sands K, Carvalho MJ, Portal E, Thomson K, Dyer C, Akpulu C, et al. Characterization of  
709 antimicrobial-resistant Gram-negative bacteria that cause neonatal sepsis in seven low-  
710 and middle-income countries. *Nat Microbiol.* 2021 Apr;6(4):512–23.
- 711 3. Musicha P, Cornick JE, Bar-Zeev N, French N, Masesa C, Denis B, et al. Trends in  
712 antimicrobial resistance in bloodstream infection isolates at a large urban hospital in  
713 Malawi (1998-2016): a surveillance study. *Lancet Infect Dis.* 2017;17(10):1042–52.
- 714 4. Salzberg NT, Sivalogan K, Bassat Q, Taylor AW, Adedini S, El Arifeen S, et al. Mortality  
715 Surveillance Methods to Identify and Characterize Deaths in Child Health and Mortality  
716 Prevention Surveillance Network Sites. *Clin Infect Dis.* 2019 Oct  
717 9;69(Supplement\_4):S262–73.
- 718 5. Wyres KL, Lam MMC, Holt KE. Population genomics of *Klebsiella pneumoniae*. *Nat Rev*  
719 *Microbiol* [Internet]. 2020 Feb 13 [cited 2020 Feb 24]; Available from:  
720 <http://www.nature.com/articles/s41579-019-0315-1>
- 721 6. Ellington MJ, Heinz E, Wailan AM, Dorman MJ, de Goffau M, Cain AK, et al. Contrasting  
722 patterns of longitudinal population dynamics and antimicrobial resistance mechanisms in  
723 two priority bacterial pathogens over 7 years in a single center. *Genome Biol.* 2019  
724 02;20(1):184.
- 725 7. Lipworth S, Vihta KD, Chau K, Barker L, George S, Kavanagh J, et al. Ten-year  
726 longitudinal molecular epidemiology study of *Escherichia coli* and *Klebsiella* species  
727 bloodstream infections in Oxfordshire, UK. *Genome Med.* 2021 Sep 3;13(1):144.
- 728 8. Fostervold A, Hetland MAK, Bakksjø R, Bernhoff E, Holt KE, Samuelsen Ø, et al. A  
729 nationwide genomic study of clinical *Klebsiella pneumoniae* in Norway 2001-15:  
730 introduction and spread of ESBLs facilitated by clonal groups CG15 and CG307. *J*  
731 *Antimicrob Chemother.* 2022 Feb 23;77(3):665–74.
- 732 9. Thorpe H, Booton R, Kallonen T, Gibbon MJ, Couto N, Passet V, et al. One Health or  
733 Three? Transmission modelling of *Klebsiella* isolates reveals ecological barriers to  
734 transmission between humans, animals and the environment [Internet]. *Microbiology*;  
735 2021 Aug [cited 2023 May 17]. Available from:  
736 <http://biorxiv.org/lookup/doi/10.1101/2021.08.05.455249>

- 737 10. Wyres KL, Nguyen TNT, Lam MMC, Judd LM, van Vinh Chau N, Dance DAB, et al.  
738 Genomic surveillance for hypervirulence and multi-drug resistance in invasive *Klebsiella*  
739 *pneumoniae* from South and Southeast Asia. *Genome Med.* 2020 Dec;12(1):11.
- 740 11. World Health Organization, editor. Antimicrobial resistance: global report on surveillance.  
741 Geneva, Switzerland: World Health Organization; 2014. 232 p.
- 742 12. Rodrigues C, Passet V, Rakotondrasoa A, Diallo TA, Criscuolo A, Brisse S. Description  
743 of *Klebsiella africanensis* sp. nov., *Klebsiella variicola* subsp. *tropicalensis* subsp. nov.  
744 and *Klebsiella variicola* subsp. *variicola* subsp. nov. *Res Microbiol.* 2019  
745 May;170(3):165–70.
- 746 13. Gordon MA, Walsh AL, Chaponda M, Soko D, Mbwinji M, Molyneux ME, et al.  
747 Bacteraemia and mortality among adult medical admissions in Malawi--predominance of  
748 non-typhi salmonellae and *Streptococcus pneumoniae*. *J Infect.* 2001 Jan;42(1):44–9.
- 749 14. Lester R, Musicha P, Kawaza K, Langton J, Mango J, Mangochi H, et al. Effect of  
750 resistance to third-generation cephalosporins on morbidity and mortality from  
751 bloodstream infections in Blantyre, Malawi: a prospective cohort study. *Lancet Microbe.*  
752 2022 Dec;3(12):e922–30.
- 753 15. Cornick J, Musicha P, Peno C, Seager E, Iroh Tam PY, Bilima S, et al. Genomic  
754 investigation of a suspected *Klebsiella pneumoniae* outbreak in a neonatal care unit in  
755 sub-Saharan Africa. *Microb Genomics.* 2021 Nov;7(11).
- 756 16. Musicha P, Msefula CL, Mather AE, Chaguza C, Cain AK, Peno C, et al. Genomic  
757 analysis of *Klebsiella pneumoniae* isolates from Malawi reveals acquisition of multiple  
758 ESBL determinants across diverse lineages. *J Antimicrob Chemother.* 2019 May  
759 1;74(5):1223–32.
- 760 17. Ejaz H, Wang N, Wilksch JJ, Page AJ, Cao H, Gujran S, et al. Phylogenetic Analysis of  
761 *Klebsiella pneumoniae* from Hospitalized Children, Pakistan. *Emerg Infect Dis.* 2017  
762 Nov;23(11):1872–5.
- 763 18. Chung The H, Karkey A, Pham Thanh D, Boinett CJ, Cain AK, Ellington M, et al. A high-  
764 resolution genomic analysis of multidrug-resistant hospital outbreaks of *Klebsiella*  
765 *pneumoniae*. *EMBO Mol Med.* 2015 Mar;7(3):227–39.
- 766 19. Wailan AM, Coll F, Heinz E, Tonkin-Hill G, Corander J, Feasey NA, et al. rPinecone:  
767 Define sub-lineages of a clonal expansion via a phylogenetic tree. *Microb Genomics.*  
768 2019;5(4).
- 769 20. Gorrie CL, Da Silva AG, Ingle DJ, Higgs C, Seemann T, Stinear TP, et al. Key  
770 parameters for genomics-based real-time detection and tracking of multidrug-resistant  
771 bacteria: a systematic analysis. *Lancet Microbe.* 2021 Nov;2(11):e575–83.
- 772 21. Mangochi H, Tolhurst R, Simpson V, Kawaza K, Chidziwisano K, Feasey NA, et al. A  
773 qualitative study exploring hand hygiene practices in a neonatal unit in Blantyre, Malawi:  
774 implications for controlling healthcare-associated infections. *Wellcome Open Res.*  
775 2022;7:146.
- 776 22. Sojo-Dorado J, López-Hernández I, Rosso-Fernandez C, Morales IM, Palacios-Baena  
777 ZR, Hernández-Torres A, et al. Effectiveness of Fosfomycin for the Treatment of  
778 Multidrug-Resistant *Escherichia coli* Bacteremic Urinary Tract Infections: A Randomized  
779 Clinical Trial. *JAMA Netw Open.* 2022 Jan 13;5(1):e2137277.

- 780 23. McGovern PC, Wible M, El-Tahtawy A, Biswas P, Meyer RD. All-cause mortality  
781 imbalance in the tigecycline phase 3 and 4 clinical trials. *Int J Antimicrob Agents*. 2013  
782 May;41(5):463–7.
- 783 24. Veleba M, Schneiders T. Tigecycline Resistance Can Occur Independently of the *ramA*  
784 Gene in *Klebsiella pneumoniae*. *Antimicrob Agents Chemother*. 2012 Aug;56(8):4466–7.
- 785 25. Zhang R, Dong N, Huang Y, Zhou H, Xie M, Chan EWC, et al. Evolution of tigecycline-  
786 and colistin-resistant CRKP (carbapenem-resistant *Klebsiella pneumoniae*) in vivo and  
787 its persistence in the GI tract. *Emerg Microbes Infect*. 2018 Jul 9;7(1):127.
- 788 26. Roy S, Datta S, Viswanathan R, Singh AK, Basu S. Tigecycline susceptibility in  
789 *Klebsiella pneumoniae* and *Escherichia coli* causing neonatal septicaemia (2007-10) and  
790 role of an efflux pump in tigecycline non-susceptibility. *J Antimicrob Chemother*. 2013  
791 May;68(5):1036–42.
- 792 27. He T, Wang R, Liu D, Walsh TR, Zhang R, Lv Y, et al. Emergence of plasmid-mediated  
793 high-level tigecycline resistance genes in animals and humans. *Nat Microbiol*. 2019  
794 Sep;4(9):1450–6.
- 795 28. Huang Y, Rana AP, Wenzler E, Ozer EA, Krapp F, Bulitta JB, et al. Aminoglycoside-  
796 resistance gene signatures are predictive of aminoglycoside MICs for carbapenem-  
797 resistant *Klebsiella pneumoniae*. *J Antimicrob Chemother*. 2022 Feb 2;77(2):356–63.
- 798 29. Follador R, Heinz E, Wyres KL, Ellington MJ, Kowarik M, Holt KE, et al. The diversity of  
799 *Klebsiella pneumoniae* surface polysaccharides. *Microb Genomics*. 2016;2(8):e000073.
- 800 30. Kelly SD, Ovchinnikova OG, Müller F, Steffen M, Braun M, Sweeney RP, et al.  
801 Identification of a second glycoform of the clinically prevalent O1 antigen from *Klebsiella*  
802 *pneumoniae*. *Proc Natl Acad Sci U S A*. 2023 Jul 18;120(29):e2301302120.
- 803 31. Lam MMC, Wick RR, Judd LM, Holt KE, Wyres KL. Kaptive 2.0: updated capsule and  
804 lipopolysaccharide locus typing for the *Klebsiella pneumoniae* species complex. *Microb*  
805 *Genomics* [Internet]. 2022 Mar 21 [cited 2023 Jul 20];8(3). Available from:  
806 <https://www.microbiologyresearch.org/content/journal/mgen/10.1099/mgen.0.000800>
- 807 32. Orskov I, Fife-Asbury MA. New *Klebsiella* Capsular Antigen, K82, and the Deletion of  
808 Five of Those Previously Assigned. *Int J Syst Bacteriol*. 1977 Oct 1;27(4):386–7.
- 809 33. Edmunds PN. Further *Klebsiella* Capsule Types. *J Infect Dis*. 1954 Jan 1;94(1):65–71.
- 810 34. Edwards PR, Fife MA. Capsule Types of *Klebsiella*. *J Infect Dis*. 1952 Jul 1;91(1):92–  
811 104.
- 812 35. Lewis JM, Mphasa M, Banda R, Beale MA, Heinz E, Mallewa J, et al. Colonization  
813 dynamics of extended-spectrum beta-lactamase-producing Enterobacterales in the gut  
814 of Malawian adults. *Nat Microbiol*. 2022 Oct;7(10):1593–604.
- 815 36. Lewis JM, Mphasa M, Banda R, Beale MA, Mallewa J, Heinz E, et al. Genomic and  
816 antigenic diversity of colonizing *Klebsiella pneumoniae* isolates mirrors that of invasive  
817 isolates in Blantyre, Malawi. *Microb Genomics*. 2022 Mar;8(3):000778.
- 818 37. Feasey NA, Houston A, Mukaka M, Komrower D, Mwalukomo T, Tenthani L, et al. A  
819 Reduction in Adult Blood Stream Infection and Case Fatality at a Large African Hospital

- 820 following Antiretroviral Therapy Roll-Out. Pett S, editor. PLoS ONE. 2014 Mar  
821 18;9(3):e92226.
- 822 38. Lewis JM, Lester R, Mphasa M, Banda R, Edwards T, Thomson NR, et al. Emergence of  
823 carbapenemase-producing Enterobacteriaceae in Malawi. J Glob Antimicrob Resist.  
824 2020 Mar;20:225–7.
- 825 39. Kumwenda GP, Sugawara Y, Abe R, Akeda Y, Kasambara W, Chizani K, et al. First  
826 Identification and genomic characterization of multidrug-resistant carbapenemase-  
827 producing Enterobacteriaceae clinical isolates in Malawi, Africa. J Med Microbiol. 2019  
828 Dec 1;68(12):1707–15.
- 829 40. Zhang F, Li Q, Bai J, Ding M, Yan X, Wang G, et al. Heteroresistance to Amikacin in  
830 Carbapenem-Resistant *Klebsiella pneumoniae* Strains. Front Microbiol. 2021;12:682239.
- 831 41. Mankhomwa J, Tolhurst R, M'biya E, Chikowe I, Banda P, Mussa J, et al. A Qualitative  
832 Study of Antibiotic Use Practices in Intensive Small-Scale Farming in Urban and Peri-  
833 Urban Blantyre, Malawi: Implications for Antimicrobial Resistance. Front Vet Sci. 2022  
834 May 24;9:876513.
- 835 42. Darlow CA, Farrington N, Johnson A, McEntee L, Unsworth J, Jimenez-Valverde A, et  
836 al. Flomoxef and fosfomycin in combination for the treatment of neonatal sepsis in the  
837 setting of highly prevalent antimicrobial resistance. J Antimicrob Chemother. 2022 Apr  
838 27;77(5):1334–43.
- 839 43. Lipworth S, Vihta KD, Chau KK, Kavanagh J, Davies T, George S, et al. Ten Years of  
840 Population-Level Genomic *Escherichia coli* and *Klebsiella pneumoniae* Serotype  
841 Surveillance Informs Vaccine Development for Invasive Infections. Clin Infect Dis. 2021  
842 Dec 16;73(12):2276–82.
- 843 44. Heinz E, Ejaz H, Bartholdson Scott J, Wang N, Gujran S, Pickard D, et al. Resistance  
844 mechanisms and population structure of highly drug resistant *Klebsiella* in Pakistan  
845 during the introduction of the carbapenemase NDM-1. Sci Rep. 2019 Dec;9(1):2392.
- 846 45. Heinz E, Brindle R, Morgan-McCalla A, Peters K, Thomson NR. Caribbean multi-centre  
847 study of *Klebsiella pneumoniae*: whole-genome sequencing, antimicrobial resistance  
848 and virulence factors. Microb Genomics [Internet]. 2019 May 1 [cited 2020 Feb 24];5(5).  
849 Available from:  
850 <https://www.microbiologyresearch.org/content/journal/mgen/10.1099/mgen.0.000266>
- 851 46. Wantuch PL, Knoot CJ, Robinson LS, Vinogradov E, Scott NE, Harding CM, et al.  
852 Capsular polysaccharide inhibits vaccine-induced O-antigen antibody binding and  
853 function across both classical and hypervirulent K2:O1 strains of *Klebsiella pneumoniae*.  
854 Hakansson AP, editor. PLOS Pathog. 2023 May 5;19(5):e1011367.
- 855 47. Loraine J, Heinz E, De Sousa Almeida J, Milevskyy O, Voravuthikunchai SP, Srimanote  
856 P, et al. Complement Susceptibility in Relation to Genome Sequence of Recent  
857 *Klebsiella pneumoniae* Isolates from Thai Hospitals. mSphere. 2018 07;3(6).
- 858 48. Kol O, Wieruszkeski JM, Strecker G, Fournet B, Zalisz R, Smets P. Structure of the O-  
859 specific polysaccharide chain of *Klebsiella pneumoniae* O1K2 (NCTC 5055)  
860 lipopolysaccharide. A complementary elucidation. Carbohydr Res. 1992 Dec  
861 15;236:339–44.

- 862 49. Whitfield C, Richards JC, Perry MB, Clarke BR, MacLean LL. Expression of two  
863 structurally distinct D-galactan O antigens in the lipopolysaccharide of *Klebsiella*  
864 *pneumoniae* serotype O1. *J Bacteriol.* 1991 Feb;173(4):1420–31.
- 865 50. Kol O, Wieruszkeski JM, Strecker G, Montreuil J, Fournet B, Zalisz R, et al. Structure of  
866 the O-specific polysaccharide chain from *Klebsiella pneumoniae* O1K2 (NCTC 5055)  
867 lipopolysaccharide. *Carbohydr Res.* 1991 Sep 18;217:117–25.
- 868 51. Wood DE, Salzberg SL. Kraken: ultrafast metagenomic sequence classification using  
869 exact alignments. *Genome Biol.* 2014 Mar 3;15(3):R46.
- 870 52. Bankevich A, Nurk S, Antipov D, Gurevich AA, Dvorkin M, Kulikov AS, et al. SPAdes: a  
871 new genome assembly algorithm and its applications to single-cell sequencing. *J*  
872 *Comput Biol J Comput Mol Cell Biol.* 2012 May;19(5):455–77.
- 873 53. Page AJ, De Silva N, Hunt M, Quail MA, Parkhill J, Harris SR, et al. Robust high-  
874 throughput prokaryote de novo assembly and improvement pipeline for Illumina data.  
875 *Microb Genomics.* 2016;2(8):e000083.
- 876 54. Seemann T. Prokka: rapid prokaryotic genome annotation. *Bioinforma Oxf Engl.* 2014  
877 Jul 15;30(14):2068–9.
- 878 55. Hunt M, Mather AE, Sánchez-Busó L, Page AJ, Parkhill J, Keane JA, et al. ARIBA: rapid  
879 antimicrobial resistance genotyping directly from sequencing reads. *Microb Genomics.*  
880 2017;3(10):e000131.
- 881 56. Inouye M, Dashnow H, Raven LA, Schultz MB, Pope BJ, Tomita T, et al. SRST2: Rapid  
882 genomic surveillance for public health and hospital microbiology labs. *Genome Med.*  
883 2014;6(11):90.
- 884 57. Gupta SK, Padmanabhan BR, Diene SM, Lopez-Rojas R, Kempf M, Landraud L, et al.  
885 ARG-ANNOT, a new bioinformatic tool to discover antibiotic resistance genes in  
886 bacterial genomes. *Antimicrob Agents Chemother.* 2014;58(1):212–20.
- 887 58. McArthur AG, Waglechner N, Nizam F, Yan A, Azad MA, Baylay AJ, et al. The  
888 comprehensive antibiotic resistance database. *Antimicrob Agents Chemother.* 2013  
889 Jul;57(7):3348–57.
- 890 59. Carattoli A, Zankari E, García-Fernández A, Voldby Larsen M, Lund O, Villa L, et al. In  
891 silico detection and typing of plasmids using PlasmidFinder and plasmid multilocus  
892 sequence typing. *Antimicrob Agents Chemother.* 2014 Jul;58(7):3895–903.
- 893 60. Lam MMC, Wick RR, Watts SC, Cerdeira LT, Wyres KL, Holt KE. A genomic  
894 surveillance framework and genotyping tool for *Klebsiella pneumoniae* and its related  
895 species complex. *Nat Commun.* 2021 Jul 7;12(1):4188.
- 896 61. Wick RR, Heinz E, Holt KE, Wyres KL. Kaptive Web: User-Friendly Capsule and  
897 Lipopolysaccharide Serotype Prediction for *Klebsiella* Genomes. Diekema DJ, editor. *J*  
898 *Clin Microbiol.* 2018 Apr 4;56(6):e00197-18, [/jcm/56/6/e00197-18.atom](https://doi.org/10.1128/JCM.56.6.e00197-18).
- 899 62. Torsten Seemann. snippy: fast bacterial variant calling from NGS reads [Internet].  
900 Available from: <https://github.com/tseemann/snippy>

- 901 63. Wu KM, Li LH, Yan JJ, Tsao N, Liao TL, Tsai HC, et al. Genome sequencing and  
902 comparative analysis of *Klebsiella pneumoniae* NTUH-K2044, a strain causing liver  
903 abscess and meningitis. *J Bacteriol.* 2009 Jul;191(14):4492–501.
- 904 64. Croucher NJ, Page AJ, Connor TR, Delaney AJ, Keane JA, Bentley SD, et al. Rapid  
905 phylogenetic analysis of large samples of recombinant bacterial whole genome  
906 sequences using Gubbins. *Nucleic Acids Res.* 2015 Feb 18;43(3):e15–e15.
- 907 65. Price MN, Dehal PS, Arkin AP. FastTree: Computing Large Minimum Evolution Trees  
908 with Profiles instead of a Distance Matrix. *Mol Biol Evol.* 2009 Jul 1;26(7):1641–50.
- 909 66. Elliott AG, Ganesamoorthy D, Coin L, Cooper MA, Cao MD. Complete Genome  
910 Sequence of *Klebsiella quasipneumoniae* subsp. *similipneumoniae* Strain ATCC  
911 700603. *Genome Announc.* 2016 May 26;4(3):e00438-16.
- 912 67. Pinto-Tomás AA, Anderson MA, Suen G, Stevenson DM, Chu FST, Cleland WW, et al.  
913 Symbiotic nitrogen fixation in the fungus gardens of leaf-cutter ants. *Science.* 2009 Nov  
914 20;326(5956):1120–3.
- 915 68. Page AJ, Taylor B, Delaney AJ, Soares J, Seemann T, Keane JA, et al. SNP-sites: rapid  
916 efficient extraction of SNPs from multi-FASTA alignments. *Microb Genomics.*  
917 2016;2(4):e000056.
- 918 69. Nguyen LT, Schmidt HA, von Haeseler A, Minh BQ. IQ-TREE: A Fast and Effective  
919 Stochastic Algorithm for Estimating Maximum-Likelihood Phylogenies. *Mol Biol Evol.*  
920 2015 Jan;32(1):268–74.
- 921 70. Kalyaanamoorthy S, Minh BQ, Wong TKF, von Haeseler A, Jermini LS. ModelFinder:  
922 fast model selection for accurate phylogenetic estimates. *Nat Methods.* 2017  
923 Jun;14(6):587–9.
- 924 71. Pupko T, Pe'er I, Shamir R, Graur D. A fast algorithm for joint reconstruction of ancestral  
925 amino acid sequences. *Mol Biol Evol.* 2000 Jun;17(6):890–6.
- 926 72. Letunic I, Bork P. Interactive Tree Of Life (iTOL) v5: an online tool for phylogenetic tree  
927 display and annotation. *Nucleic Acids Res.* 2021 Jul 2;49(W1):W293–6.
- 928 73. Shen Z, Gao Q, Qin J, Liu Y, Li M. Emergence of an NDM-5-Producing Hypervirulent  
929 *Klebsiella pneumoniae* Sequence Type 35 Strain with Chromosomal Integration of an  
930 Integrative and Conjugative Element, ICE *Kp1*. *Antimicrob Agents Chemother.* 2019 Dec  
931 20;64(1):e01675-19.
- 932 74. Cabanel N, Rosinski-Chupin I, Chiarelli A, Botin T, Tato M, Canton R, et al. Evolution of  
933 VIM-1-Producing *Klebsiella pneumoniae* Isolates from a Hospital Outbreak Reveals the  
934 Genetic Bases of the Loss of the Urease-Positive Identification Character. Beiko RG,  
935 editor. *mSystems.* 2021 Jun 29;6(3):e00244-21.
- 936 75. Stoesser N, Giess A, Batty EM, Sheppard AE, Walker AS, Wilson DJ, et al. Genome  
937 sequencing of an extended series of NDM-producing *Klebsiella pneumoniae* isolates  
938 from neonatal infections in a Nepali hospital characterizes the extent of community-  
939 versus hospital-associated transmission in an endemic setting. *Antimicrob Agents*  
940 *Chemother.* 2014 Dec;58(12):7347–57.

- 941 76. Tonkin-Hill G, MacAlasdair N, Ruis C, Weimann A, Horesh G, Lees JA, et al. Producing  
942 polished prokaryotic pangenomes with the Panaroo pipeline. *Genome Biol.* 2020  
943 Dec;21(1):180.
- 944 77. Wickham H. *Ggplot2: elegant graphics for data analysis*. New York: Springer; 2009. 212  
945 p. (Use R!).
- 946 78. Yu G, Lam TTY, Zhu H, Guan Y. Two Methods for Mapping and Visualizing Associated  
947 Data on Phylogeny Using Ggtree. *Mol Biol Evol.* 2018 01;35(12):3041–3.
- 948 79. R Core Team. *A Language and Environment for Statistical Computing* [Internet]. R  
949 Foundation for Statistical Computing, Vienna.; 2021. Available from: [https://www.R-](https://www.R-project.org)  
950 [project.org](https://www.R-project.org)
- 951

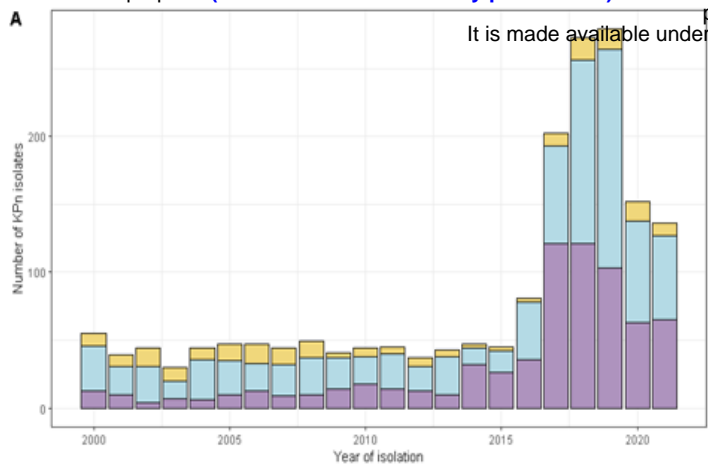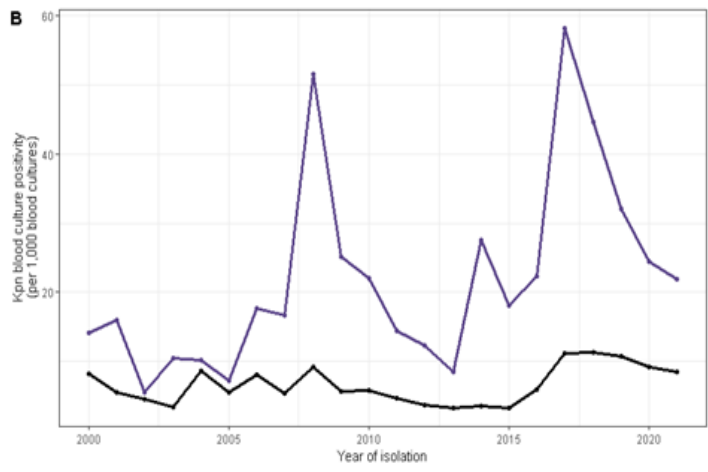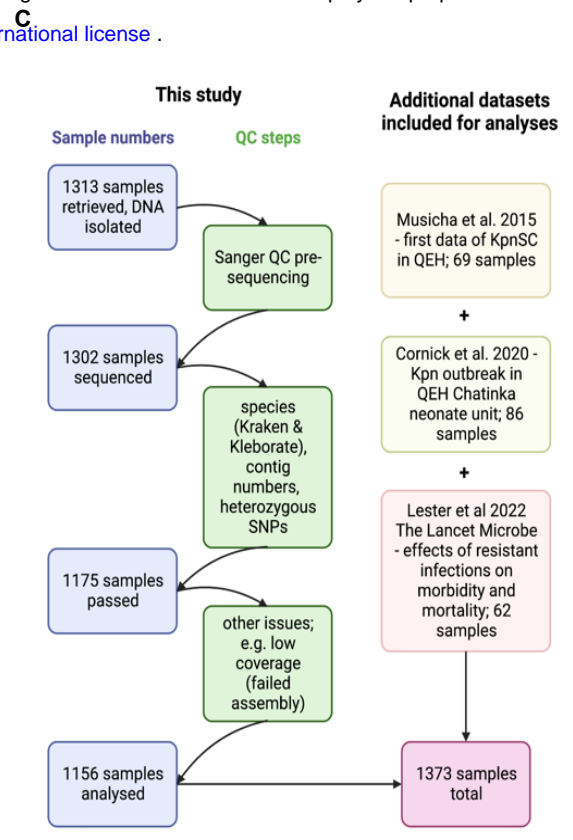



Figure 2

A) Sequence types over time

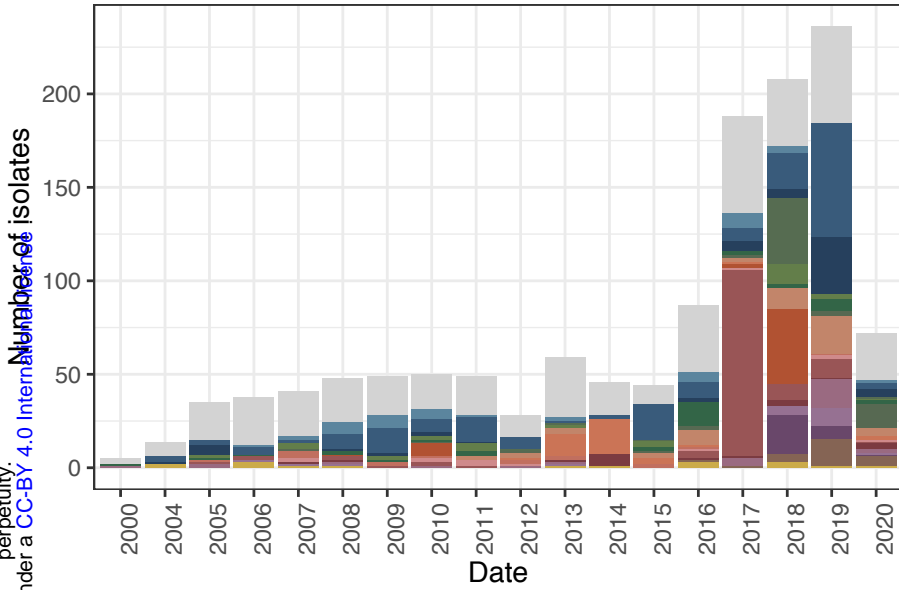

B) Wards over time

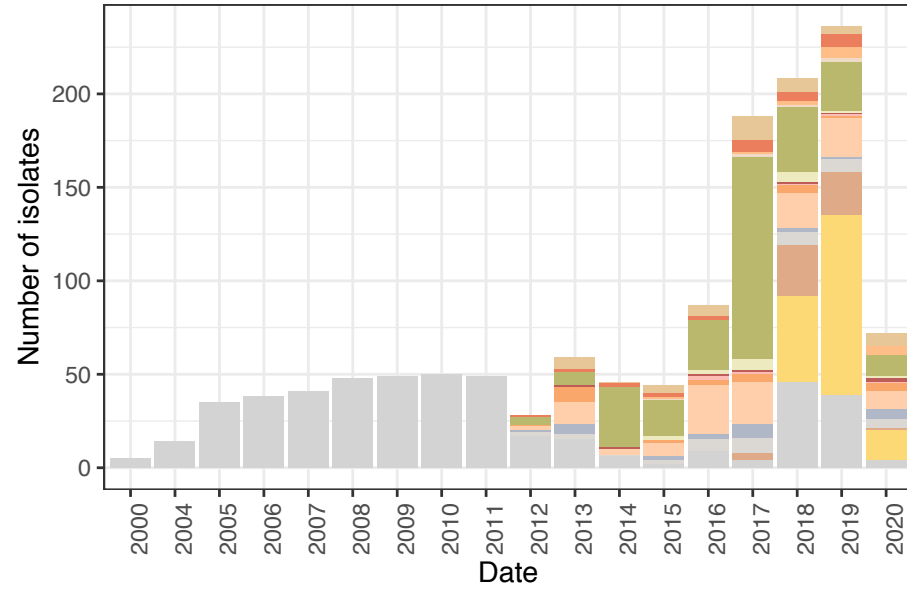

Main STs

- other
- ST101
- ST14
- ST15
- ST1552
- ST17
- ST25
- ST29
- ST307
- ST340
- ST35
- ST36
- ST37
- ST39
- ST391
- ST45
- ST48
- ST584
- ST607
- ST86

Major wards

- 3B MALE MEDICAL WARD
- 4A FEMALE MEDICAL WARD
- A ETC
- BURNS UNITS
- CHATINKHA NURSERY
- INTENSIVE CARE UNIT
- PAEDIATRIC A&E
- PAEDIATRIC MEDICAL BAY/WARD
- PAEDIATRIC MOYO WARD
- PAEDIATRIC NURSERY
- PAEDIATRIC ONCOLOGY
- PAEDIATRIC SPECIAL CARE WARD
- PAEDIATRIC SURGICAL WARD
- PICU/HDU
- unknown

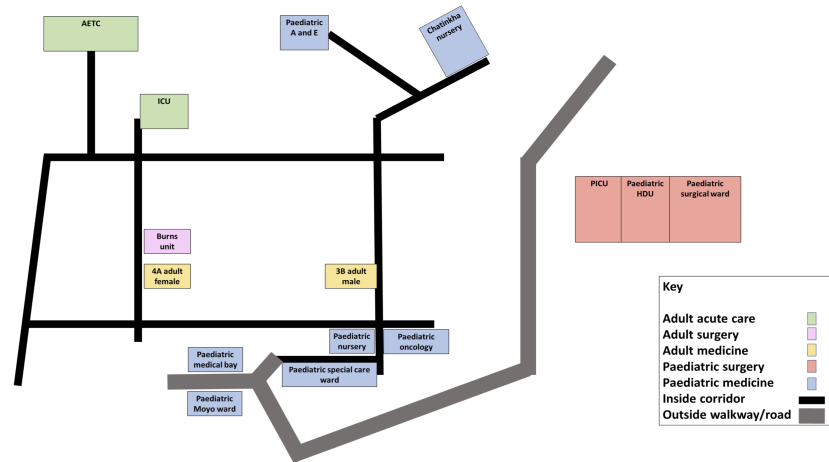

Figure 3

A) *K. pneumoniae* subsp. *pneumoniae*

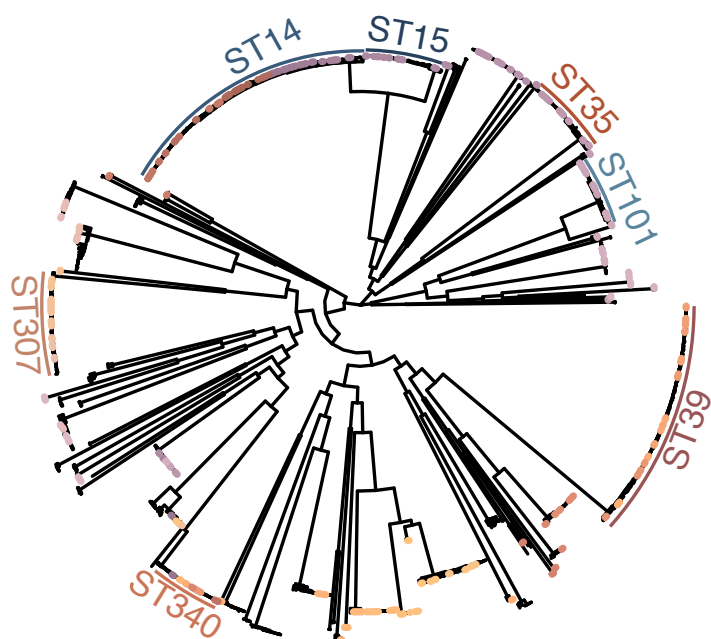

B) *K. quasipneumoniae*

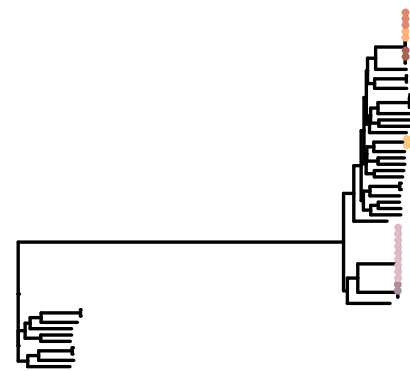

C) *K. variicola*

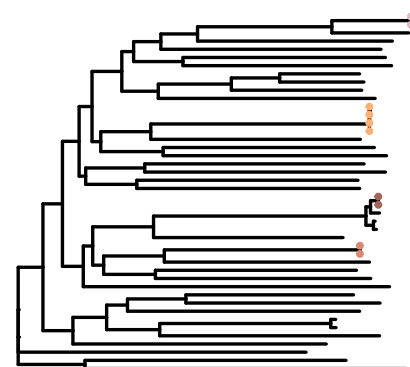

D) ST35

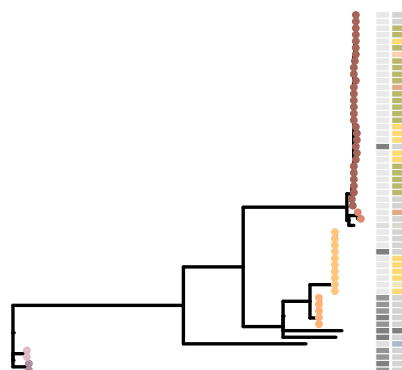

E) ST39

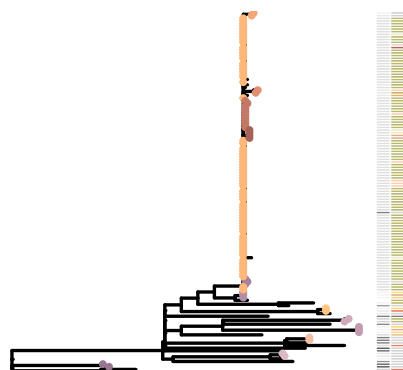

F) ST14 & ST15

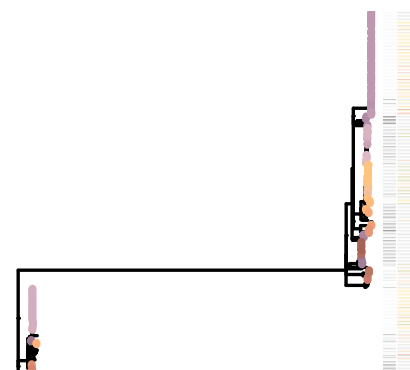

Figure 4

### A) ESBL genes over time

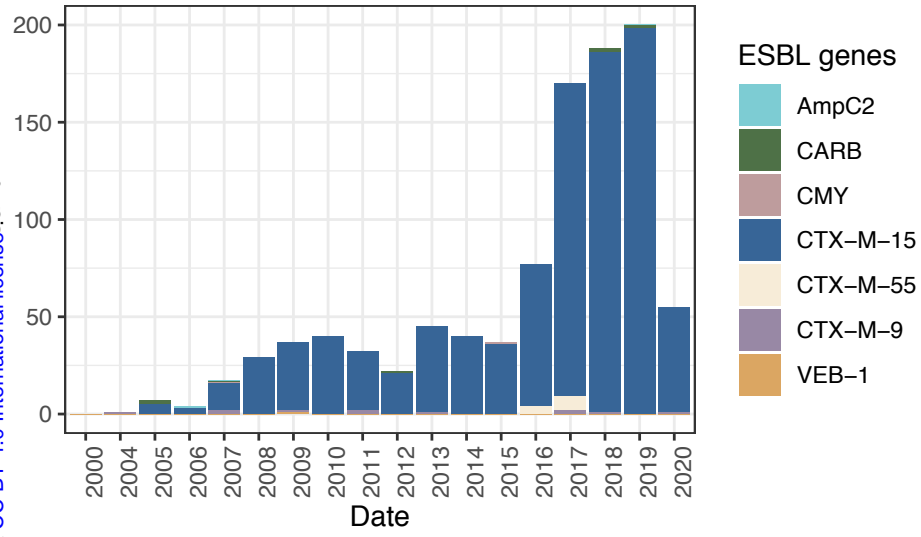

B)

### Phenotype vs chloramphenicol resistance genes

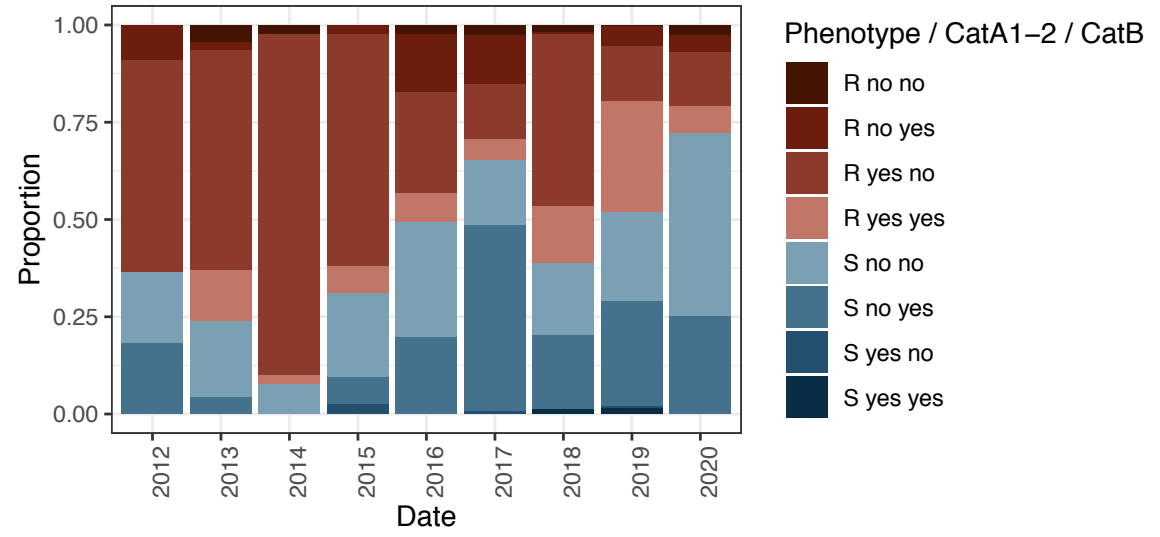

### C) Phenotype vs predicted amikacin resistance

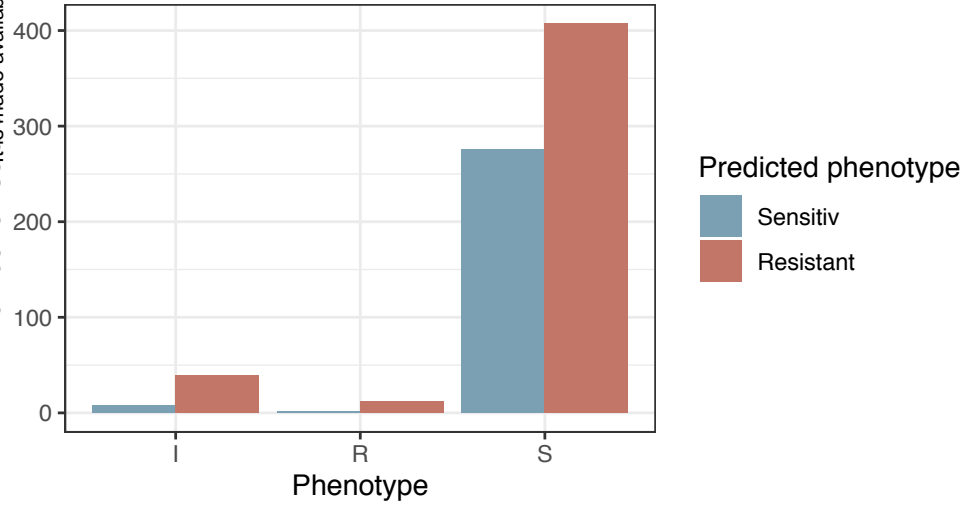

D)

### Phenotype vs predicted gentamicin resistance

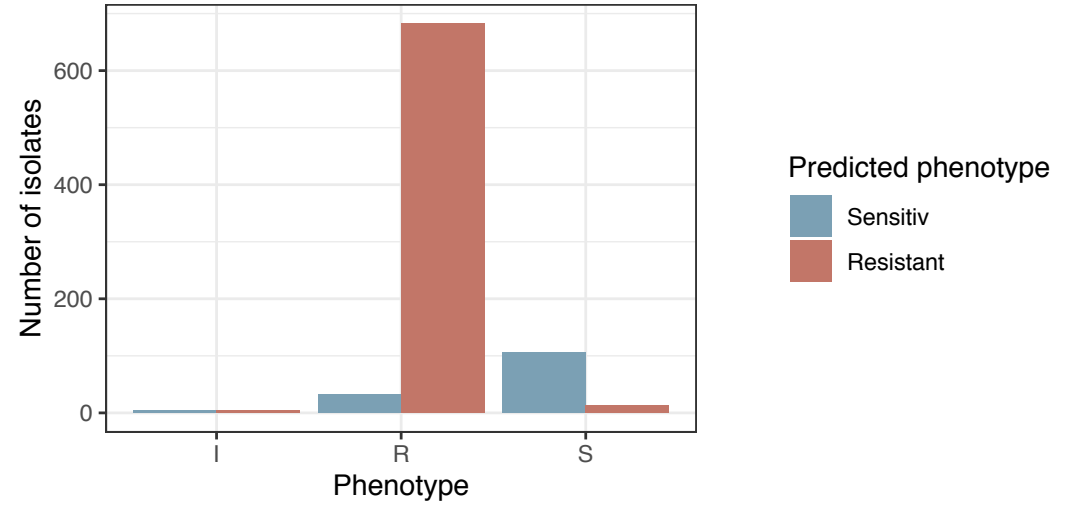

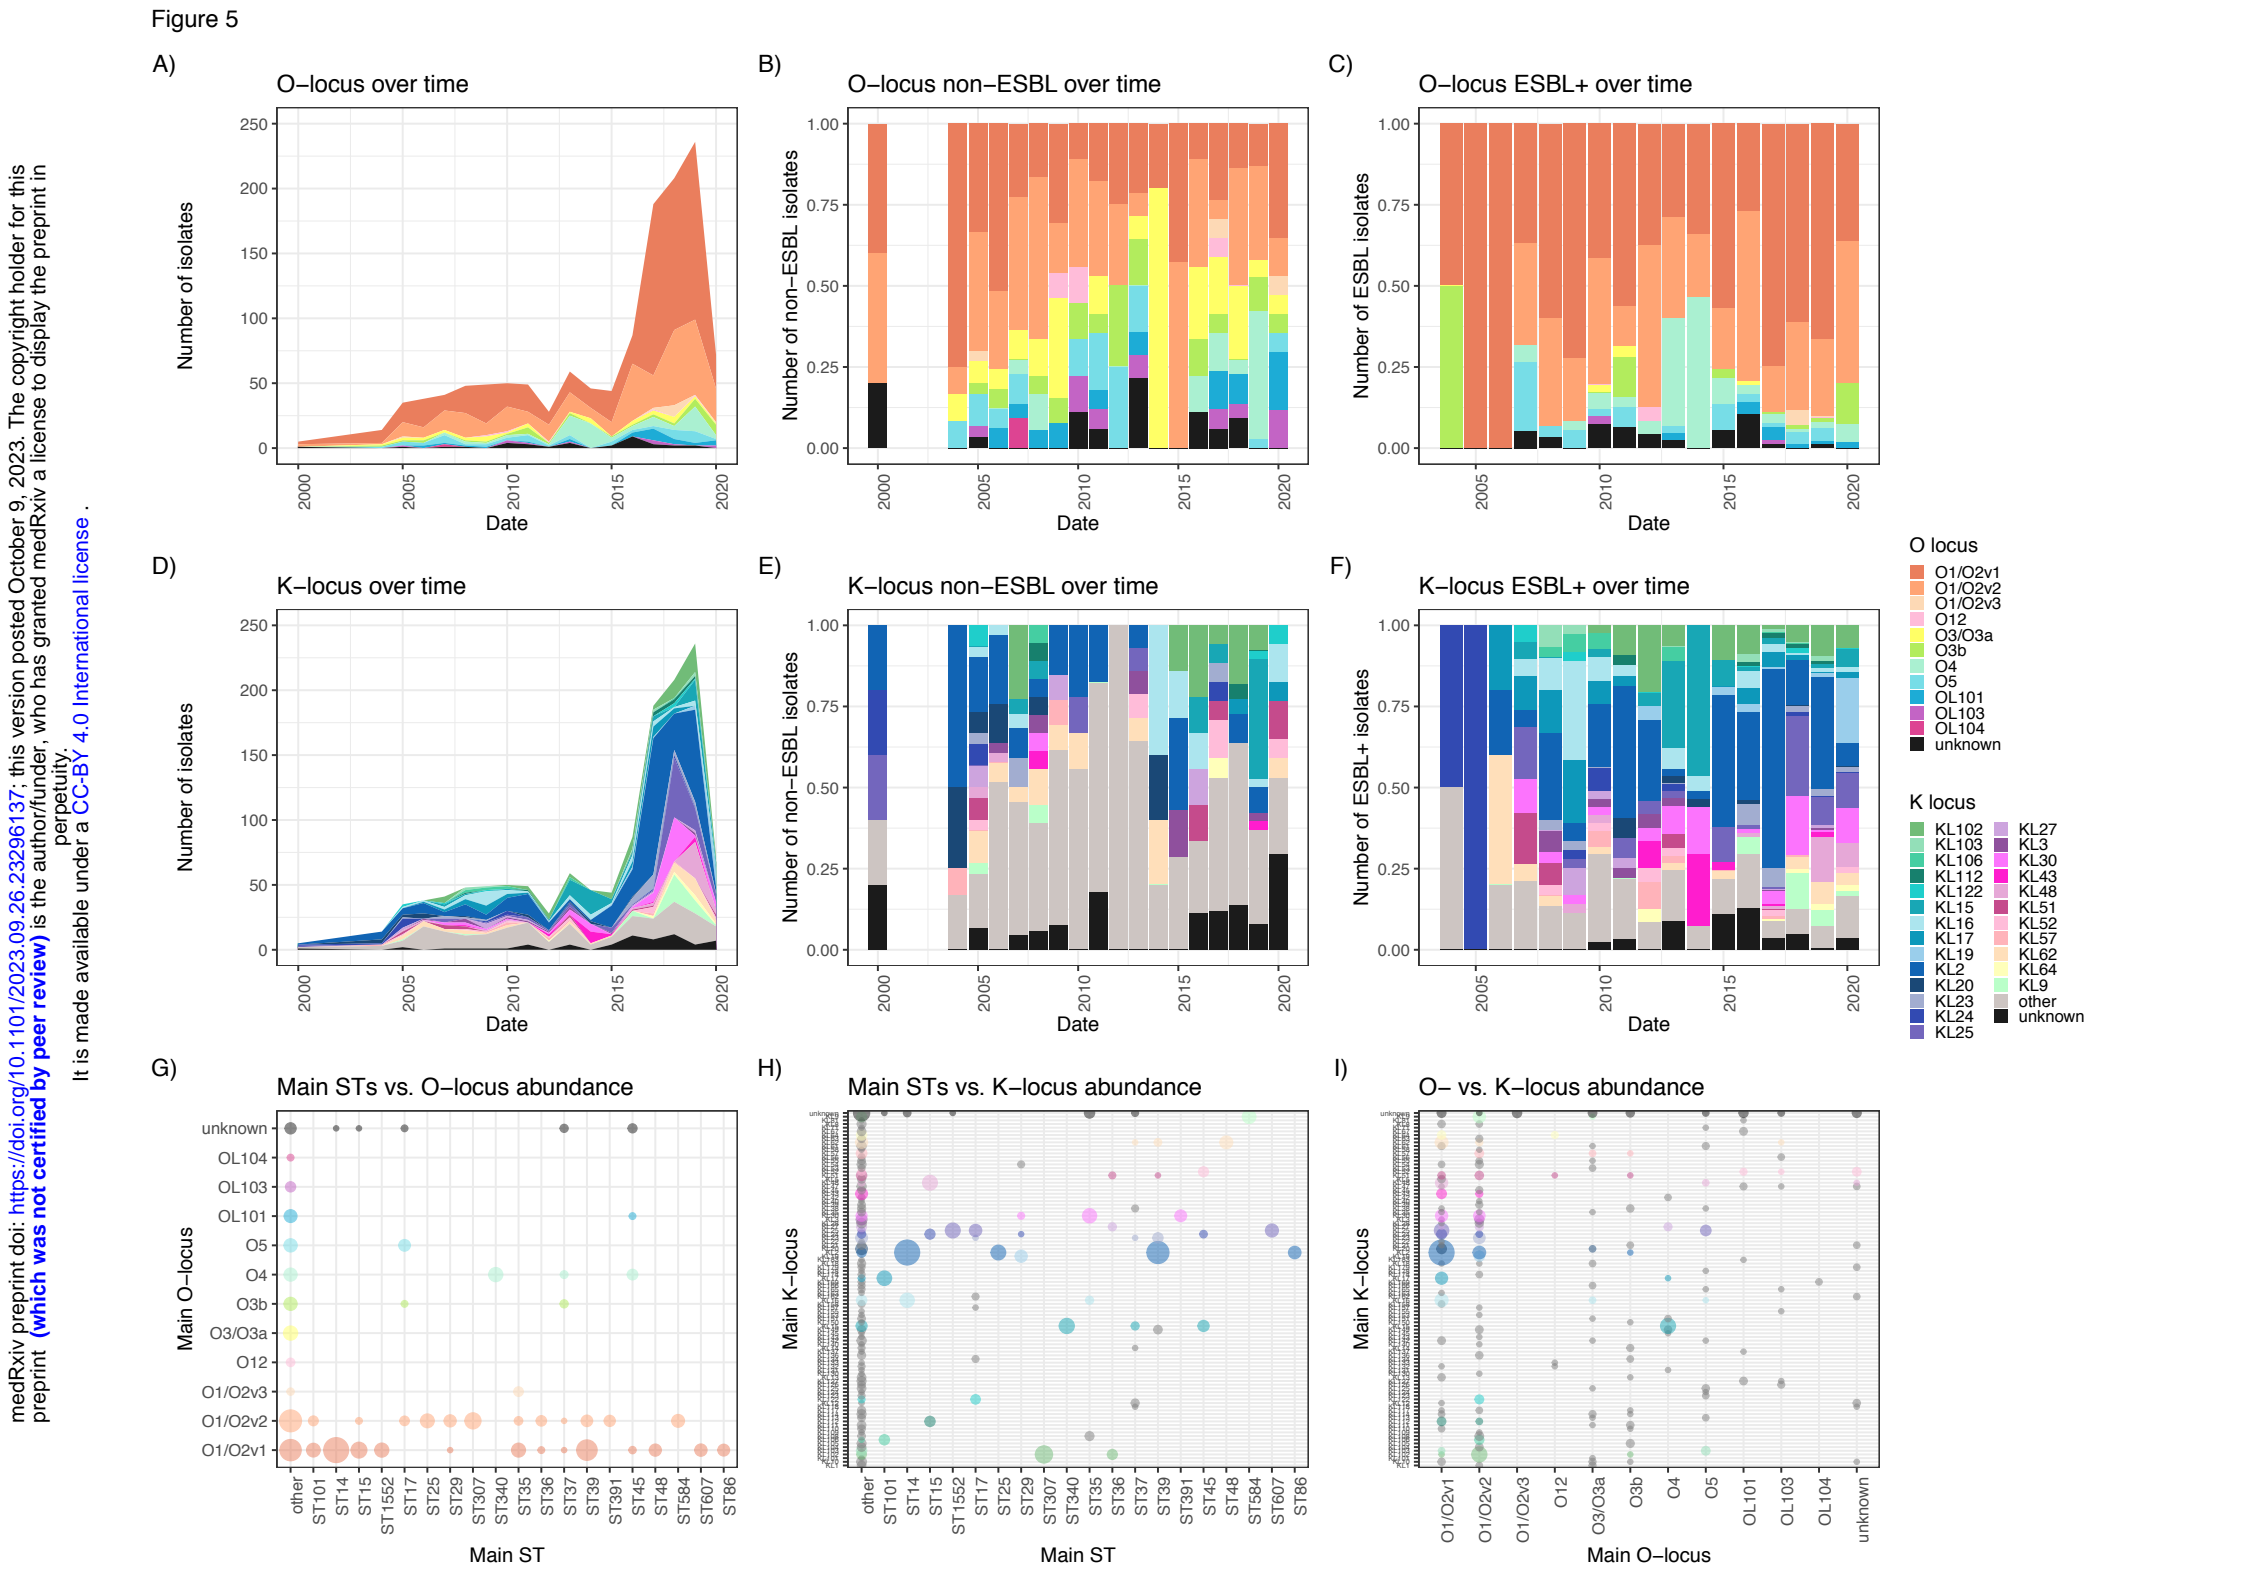

Source: https://medrxiv.org/content/10.1101/2023.09.26.23296137.full.pdf
